## 1 **JAK-STAT Signaling Enables Lineage Plasticity-driven AR Targeted Therapy Resistance**

2  
3 **Authors:** Su Deng<sup>1,†</sup>, Choushi Wang<sup>1,†</sup>, Yunguan Wang<sup>2,†</sup>, Yaru Xu<sup>1</sup>, Xiaoling Li<sup>1</sup>, Nickolas  
4 A Johnson<sup>1</sup>, U-Ging Lo<sup>3</sup>, Lingfan Xu<sup>4</sup>, Julisa Gonzalez<sup>1</sup>, Lauren A Metang<sup>1</sup>, Jianfeng Ye<sup>5</sup>, Carla  
5 Rodriguez Tirado<sup>1</sup>, Kathia Rodarte<sup>6</sup>, Zhiqun Xie<sup>2</sup>, Carlos Arana<sup>7</sup>, Valli Annamalai<sup>1</sup>, Jer-Tsong  
6 Hsieh<sup>4</sup>, Donald J. Vander Griend<sup>8</sup>, Bo Li<sup>5</sup>, Tao Wang<sup>2</sup>, Ping Mu<sup>1,9,10,\*</sup>

### 7 **Affiliations:**

8  
9 <sup>1</sup>Department of Molecular Biology, UT Southwestern Medical Center, Dallas, TX 75390, USA

10 <sup>2</sup>Quantitative Biomedical Research Center, Department of Population and Data Sciences,  
11 University of Texas Southwestern Medical Center, Dallas, TX, USA, 75390.

12 <sup>3</sup>Department of Urology, UT Southwestern Medical Center, Dallas, TX 75390, USA

13 <sup>4</sup>Department of Pathology, Duke University School of Medicine, Durham, NC, USA 27705

14 <sup>5</sup>Lyda Hill Department of Bioinformatics, UT Southwestern Medical Center, Dallas, TX 75390,  
15 USA

16 <sup>6</sup>Department of Neuroscience, UT Southwestern Medical Center, Dallas, TX 75390, USA

17 <sup>7</sup>Wakeland Genomics Core, UT Southwestern Medical Center, Dallas, TX 75390, USA

18 <sup>8</sup>Department of Pathology; The University of Illinois at Chicago; Chicago, IL 60637; USA

19 <sup>9</sup>Hamon Center for Regenerative Science and Medicine, UT Southwestern Medical Center, Dallas,  
20 TX 75390, USA

21 <sup>10</sup>Harold C. Simmons Comprehensive Cancer Center, UT Southwestern Medical Center, Dallas,  
22 TX 75390, USA

23 † These authors contributed equally to this work.

24 \*Correspondence to: [Ping.Mu@UTSouthwestern.edu](mailto:Ping.Mu@UTSouthwestern.edu) (P.M.)

25 **Abstract:** Emerging evidence indicates that various cancers can gain resistance to targeted  
26 therapies by acquiring lineage plasticity. Although various genomic and transcriptomic aberrations  
27 correlate with lineage plasticity-driven resistance, the molecular mechanisms of acquiring lineage  
28 plasticity have not been fully elucidated. Through integrated transcriptomic and single cell RNA-  
29 Seq (scRNA-Seq) analysis of more than 80,000 cells, we reveal for the first time that the Janus  
30 kinase (JAK)-signal transducer and activator of transcription (STAT) signaling is a crucial  
31 executor in promoting lineage plasticity-driven AR targeted therapy resistance in prostate cancer.  
32 Ectopic activation of JAK-STAT signaling is specifically required for the AR targeted therapy  
33 resistance of subclones expressing multilineage, stem-like and epithelial-to-mesenchymal  
34 transition (EMT) lineage transcriptional programs and represents a potential therapeutic target for  
35 overcoming AR targeted therapy resistance.

36  
37 **One-Sentence Summary:** JAK-STAT signaling is a crucial executor in promoting lineage  
38 plasticity-driven AR therapy resistance in prostate cancer.

39  
40 **Main Text:** Despite the clinical success of targeted therapies directed towards specific driver  
41 oncogenes in many cancers, resistance to these therapies often emerges quickly, resulting in poor  
42 clinical outcomes. Metastatic castration resistant prostate cancer (mCRPC) serves as a salient  
43 example of this phenomenon, whereby resistance to the Androgen Receptor (AR) targeted  
44 therapies, such as enzalutamide, with subsequent disease progression occurs rapidly and is often  
45 inevitable (1–3). Several mechanisms have been revealed to confer resistance to AR targeted

46 therapy through either the restoration of AR signaling (4) or the bypass of AR signaling via other  
47 transcription factors (5–7). Recently, emerging evidence has demonstrated a third mechanism of  
48 resistance called lineage plasticity, whereby the luminal prostate epithelial cells transition to a  
49 lineage plastic state independent of AR(8). The acquisition of lineage plasticity may result in cells  
50 transitioning to a multi-lineage, stem cell-like and lineage plastic state followed by  
51 redifferentiation to new lineages, or possibly direct trans-differentiation to a different lineage, such  
52 as the lineage with neuroendocrine (NE) differentiation (8).

53  
54 One example of the lineage plasticity-driven resistance occurs in mCRPC with concurrent  
55 loss-of-function of TP53 and RB1, which is then accompanied by ectopic activation of SOX2(9,  
56 10). Similar cases of lineage plasticity have been observed in mCRPC carrying various genomic  
57 and transcriptional aberrations, including but not limited to aberrations in PTEN, FOXA1, BRN2,  
58 SOX11, N-MYC, PEG10, CHD1, REST, and BRG1 (7, 11–18). This lineage plasticity-driven  
59 resistance in mCRPC parallels examples documented in EGFR-mutant lung adenocarcinoma, ER-  
60 positive breast cancers, and BRAF-mutant melanoma (19–22). However, the molecular  
61 mechanism that promotes lineage plasticity in many mCRPC subtypes, especially in the context  
62 of TP53/RB1-deficiency, is not fully understood. Furthermore, therapeutic approaches targeting  
63 lineage plasticity-driven resistance are not currently available, underlying the unmet clinical  
64 urgency to identify druggable targets that drive lineage plasticity.

65  
66 In this study, through a multi-disciplinary approach integrating 3D organoid modeling, as  
67 well as bulk and single cell RNA-Seq (scRNA-Seq) analysis, we reveal that the ectopic activation  
68 of JAK-STAT signaling pathway is required for the lineage plasticity-driven AR targeted therapy  
69 resistance in mCRPC with TP53/RB1-deficiency and SOX2 upregulation. For the first time, our  
70 scRNA-Seq results revealed that JAK-STAT signaling is specifically required for the AR therapy  
71 resistance of subclones expressing multilineage, stem-like and lineage plastic survival  
72 transcriptional programs, but not the subclones only expressing the NE-like lineage program. We  
73 also demonstrate that both genetic and pharmaceutical inactivation of key components of the JAK-  
74 STAT signaling pathway, including JAK1 and STAT1, re-sensitize the resistant mCRPC tumors  
75 to AR targeted therapy. Collectively, these findings suggest that the upregulation of JAK-STAT  
76 signaling pathway is a crucial executor driving lineage plasticity, which enables us to identify  
77 potential therapeutic targets to overcome AR targeted therapy resistance.

78  
79 To investigate the underlying molecular driver of lineage plasticity and resistance in the  
80 TP53/RB1-deficient mCRPC, we first inquired which transcriptional programs changed  
81 concomitantly with the loss of TP53 and RB1, as well as the upregulation of SOX2. By leveraging  
82 a series of LNCaP/AR cell lines we have previously generated(10), we initially profiled the  
83 transcriptomic changes induced by TP53/RB1-deficiency and overexpression of SOX2 in four cell  
84 lines which were not exposed to the AR therapy drug enzalutamide, specifically the shNT,  
85 shTP53/RB1, shTP53/RB1/SOX2, and SOX2-OE (overexpression) cell lines. As expected, these  
86 genetic modifications led to global transcriptomic changes, and Gene Set Enrichment Analysis  
87 (GSEA) revealed significantly altered pathways (Fig.1A, fig.S1A). Notably, the JAK-STAT  
88 signaling pathway is among the most significantly upregulated pathways altered by TP53/RB1-  
89 loss and SOX2 overexpression, while, in contrast, it is downregulated in TP53/RB1/SOX2 triple  
90 knockdown cells (Fig.1A, fig.S1B-D). To decipher how these transcriptional changes specifically  
91 contribute to the AR therapy resistance, we continued to investigate pathway aberrations by

92 profiling a second set of cell lines and examined the signaling pathway alterations upon  
93 enzalutamide treatment in comparison to vehicle (shNT-Enz/Veh, shTP53/RB1-Enz/Veh). Again,  
94 we uncovered that the components of the JAK-STAT signaling pathway were consistently  
95 upregulated in the resistant cells treated with enzalutamide (fig.S1A, E, F). Interestingly, the JAK-  
96 STAT pathway did not significantly change in shNT cells treated with enzalutamide, suggesting it  
97 has a specific role in the context of TP53/RB1 deficiency (fig.S1A).

98  
99 In normal tissues, the JAK-STAT signaling pathway regulates various biological  
100 processes, including immune response, inflammation, embryonic development, cell fate decision,  
101 differentiation, and hematopoiesis(23, 24). Notably, numerous lines of evidence from both  
102 mammalian and *Drosophila* systems implicate that JAK-STAT signaling regulates stem cell self-  
103 renewal and multi-lineage differentiation(23, 25), indicating its potential role in regulating cellular  
104 lineage plasticity. The biological consequence of JAK-STAT activation on tumorigenesis is  
105 complicated and considered a “double-edged sword.” On the one hand, JAK-STAT signaling  
106 promotes antitumor immune surveillance and is associated with a favorable clinical outcome in  
107 some cancers, including colorectal cancer and head and neck squamous cell carcinoma(23).  
108 Conversely, the constitutive activation of JAK-STAT signaling has been correlated with poor  
109 clinical outcomes in hematological malignancies and many solid tumors, including melanoma,  
110 glioblastoma, head, neck, lung, pancreas, breast, rectal, and prostate cancers (PCa)(23, 26–28).  
111 This “double-edged sword” effect of JAK-STAT activation is particularly puzzling in the case of  
112 IL-6/STAT3, as IL6-induced STAT3 has been reported to promote PCa NE-differentiation and  
113 cell cycle arrest(29–31), while antagonizing the AR inhibition induced PCa cell apoptosis and  
114 proliferation inhibition (32–36). In addition, JAK-STAT activation has been shown to promote  
115 EMT, invasion and metastasis of PCa(37–41), further indicating its important role in regulating  
116 PCa lineage transition. Collectively, the observed ectopic upregulation of JAK-STAT signaling in  
117 the TP53/RB1-deficient and SOX2 overexpression PCa cells raises the intriguing possibility that  
118 it may play a crucial role in acquiring lineage plasticity-driven AR therapy resistance.

119  
120 To dissect the role of JAK-STAT in the enzalutamide resistance associated with  
121 TP53/RB1-deficiency, we first knocked-out (KO) TP53 and RB1 in LNCaP/AR cells, a well  
122 credentialed enzalutamide-sensitive mCRPC cell model, with CRISPR guides cis-linked with  
123 RFP, and generated a stable enzalutamide resistant sgTP53/RB1 clone. Those sgTP53/RB1 cells  
124 proliferated significantly quicker when enzalutamide was introduced into the media, in comparison  
125 to the sgNT cells expressing GFP (fig.S2A-C). The sgTP53/RB1 cells display clear lineage  
126 plasticity as they express significantly increased non-luminal lineage specific genes (fig.S2D),  
127 including basal (*KRT5*, *TP63*), NE-like (*SYP*, *CHGA*, *NSE*, *ASCL1*), and EMT (*CDH2*, *WNT5A*,  
128 *EPAS1*, *TGFB*, *SMAD2*) genes, as well as genes that specify stem cell-like characteristics (*SOX2*,  
129 *NANOG*, *OCT4*). In the sgTP53/RB1 cells we also observed significant upregulation of many  
130 canonical genes activated by the JAK-STAT signaling pathway, which was comparable to the level  
131 of JAK-STAT genes induced by SOX2 overexpression (Fig.1B). Consistent with these qPCR  
132 results, an increase of H3K27 acetylation (H3K27ac) and H3K4 trimethylation (H3K4me3), as  
133 well as a decrease of H3K27 trimethylation (H3K27me3) at the JAK1 gene locus upon depletion  
134 of TP53/RB1 was also identified through chromatin immunoprecipitation coupled with qPCR  
135 (ChIP-qPCR), indicating a transcriptional upregulation of JAK1 (fig.S3A-C). Interestingly, SOX2  
136 knockout (KO) in the TP53/RB1-deficient cells largely impaired the upregulation of those JAK-  
137 STAT signaling genes (Fig.1B), indicating the critical role of SOX2 in the activation of JAK-

138 STAT signaling. This hypothesis is further supported by SOX2 chromatin immunoprecipitation-  
139 sequencing (ChIP-Seq) analysis performed on an established enzalutamide resistant mCRPC cell  
140 line, CWR-R1, which demonstrated strong and unique SOX2 binding to those canonical JAK-  
141 STAT genes in resistant mCRPC, compared to the SOX2 binding in embryonic stem cell line  
142 WA01 (fig.S3D, E, raw ChIP-seq data reported in Larischa et al., *Oncogene*, in press).

143  
144 To determine whether sustained JAK-STAT signaling is required to maintain the resistance  
145 in tumor cells with TP53/RB1-deficiency, we KO several of the significantly upregulated JAK-  
146 STAT signaling genes in the sgTP53/RB1 cells and observed that depletion of JAK1 and STAT1  
147 blunted the resistant growth of sgTP53/RB1 cells when treated with enzalutamide (Fig.1C,  
148 fig.S4A,B). Interestingly, inactivation of those JAK-STAT genes in the cells carrying wildtype  
149 TP53 and RB1 did not significantly influence the growth of tumor cells (fig.S4C), suggesting the  
150 oncogenic role of JAK-STAT is specific for mCRPC with TP53/RB1-deficiency. These findings  
151 were validated *in vivo* in castrated SCID (Severe Combined Immunodeficient) mice treated with  
152 enzalutamide, where the depletion of JAK1 and STAT1 largely re-sensitized the sgTP53/RB1  
153 xenografted tumors to enzalutamide treatment (Fig.1D). To dissect the connection between JAK-  
154 STAT signaling and lineage plasticity, we examined the expression of canonical lineage marker  
155 genes in the sgTP53/RB1/JAK1 cells, which have suppressed JAK-STAT signaling (fig.4D,E),  
156 and observed that JAK1 depletion largely attenuated the upregulation of stem-like (*SOX2*,  
157 *NANOG*, *OCT4*, *KLF4*, *NOTCH1*), basal (*KRT5*, *TP63*), NE-like (*ASCL1*, *NSE*, *SYP*) and EMT  
158 (*CDH2*, *TGFB*, *WNT5A*, *EPAS1*, *SNAIL*, *SMAD2*, *SMAD3*, *FNI*) marker genes (Fig.1E-G), which  
159 reinforced its crucial role in the acquisition of those non-luminal transcriptional programs.  
160 Consistent with an impaired upregulation of EMT as shown by qPCR (Fig.1G), JAK1 depletion  
161 also reversed most of the increased migratory and invasive ability of the sgTP53/RB1 cells  
162 (fig.S5A-D), supporting the necessity of JAK-STAT signaling in the maintenance of an EMT  
163 lineage survival program.

164  
165 To further explore whether the sustained activation of JAK-STAT signaling is required for  
166 the SOX2-promoted lineage plasticity and resistance, we knocked out JAK1 and STAT1 in the  
167 LNCaP/AR cells with SOX2-OE and observed that JAK1 and STAT1 depletion almost completely  
168 inhibited the resistant growth of LNCaP/AR-SOX2-OE cells when treated with enzalutamide, as  
169 shown in both cell proliferation assay (fig.S6A) and CellTiter-Glo assay (fig.S6B). Furthermore,  
170 the deactivation of JAK-STAT signaling in the SOX2-OE cells largely attenuated the acquisition  
171 of lineage plasticity (fig.S6C), supporting the hypothesis that JAK-STAT activation is required for  
172 SOX2-promoted lineage plasticity and AR targeted therapy resistance. Notably, we also observed  
173 significantly upregulated expression of stem-like (*SOX2*, *OCT4*, *MYC*, *NOTCH1*), basal (*KRT5*),  
174 NE-like (*ASCL1*, *NSE*) and EMT (*SNAIL*, *SNAIL2*, *FNI*) marker genes (fig.S6D) in the cells with  
175 JAK1 and STAT1 overexpression (JAK1-OE and STAT1-OE), suggesting that JAK-STAT  
176 signaling is sufficient to promote the transition to this multilineage and plastic status. The  
177 significant upregulation of SOX2 in JAK1-OE cells (fig.S6D, together with Fig1B, fig.S6A-C)  
178 also suggested a positive feedback regulation between JAK-STAT signaling and SOX2 in mCRPC  
179 tumor cells.

180  
181 Given the role of JAK-STAT signaling in promoting EMT lineage and AR therapy  
182 resistance in our preclinical model, we next examined the impact of JAK-STAT upregulation in  
183 various clinical scenarios. We investigated two PCa patient cohorts [The Cancer Genome Atlas

184 (TCGA, Firehose Legacy) and Stand Up To Cancer (SU2C)] and hypothesized that reduced  
185 sensitivity to AR targeted therapy would result in relatively higher frequency of copy number  
186 amplification and mutations of JAK-STAT genes in the metastatic castration-resistant prostate  
187 cancer (mCRPC) compared to hormone-sensitive primary cancers(42, 43). Indeed, the frequency  
188 of copy number amplification and somatic mutations in canonical JAK-STAT signaling genes  
189 were significantly higher in mCRPC (SU2C) compared to hormone naive prostate  
190 adenocarcinomas (TCGA) (fig.S7A,B), suggesting a correlation between JAK-STAT upregulation  
191 and decreased sensitivity to AR targeted therapy. We next examined both the pathological  
192 characteristics and the expression of canonical JAK-STAT genes in the TCGA cohort and  
193 discovered that patients with regional lymph nodes metastasis (N1) or high-grade tumors (Gleason  
194 score  $\geq 8$ ) have significantly higher JAK-STAT genes expression compared to the patients without  
195 regional lymph nodes metastasis (N0) or low-grade tumors (Gleason score  $\leq 7$ ) (fig.S7C,D),  
196 supporting the role of JAK-STAT in promoting PCa tumorigenesis.

197  
198 Identification of JAK-STAT signaling as a crucial executor of lineage plasticity-driven  
199 resistance raises the hope that appropriate therapeutic approaches targeting this pathway could  
200 prevent or overcome AR targeted therapy resistance. For pharmacological inhibition of JAK-  
201 STAT signaling, we turned to the specific Jak1 inhibitor, filgotinib. *In vitro* cell viability assays  
202 demonstrated that the combination treatment of enzalutamide and filgotinib significantly inhibited  
203 the growth of enzalutamide resistant sgTP53/RB1 LNCaP/AR cells (Fig.2A). These results in  
204 LNCaP/AR cells were again validated in a second PCa model, the CWR22Pc cells, where JAK1  
205 inhibition by filgotinib significantly inhibited the growth of enzalutamide resistant cells and  
206 largely attenuated the upregulation of non-luminal lineage programs (fig.S8A,B). Dose response  
207 measurements (IC50) validated that the sgTP53/RB1 cells exhibit less sensitivity to enzalutamide  
208 compared to sgNT cells (fig.S8C), while the sgTP53/RB1 cells are much more susceptible to  
209 filgotinib treatment compared to sgNT cells (fig.S8D). These *in vitro* results are further supported  
210 by *in vivo* xenograft experiments, as the combination treatment of enzalutamide and filgotinib  
211 stagnated the growth of enzalutamide resistant sgTP53/RB1 tumors and induced tumor regression  
212 compared to either drug alone (Fig.2b). Consistent with the genetic modification results (fig.S6),  
213 JAK1 inhibition by filgotinib treatment significantly re-sensitized the SOX2-OE cells to  
214 enzalutamide (fig.S8E) and largely attenuated the acquisition of lineage plasticity in these cells  
215 (fig.S8F), supporting the hypothesis that JAK-STAT activation is required for the SOX2-promoted  
216 lineage plasticity and AR targeted therapy resistance.

217  
218 To further explore the effect of JAK1 inhibition in a genetically defined model, we utilized  
219 our previously generated mouse prostate organoids derived from the Trp53<sup>loxP/loxP</sup>, Rb1<sup>loxP/loxP</sup> mice  
220 after infection with Cre or empty lentivirus (10). In contrast to the typical lumen structure, which  
221 the Trp53<sup>loxP/loxP</sup>, Rb1<sup>loxP/loxP</sup>+Empty organoids formed in 3D culture, the Trp53<sup>loxP/loxP</sup>,  
222 Rb1<sup>loxP/loxP</sup>+Cre organoids displayed a hyperplastic morphology, where the organoid cells formed  
223 a solid ball and finger-type structures invading the surrounding matrigel (Fig.2C), indicating an  
224 invasive phenotype. These Trp53<sup>loxP/loxP</sup>, Rb1<sup>loxP/loxP</sup>+Cre organoids were significantly resistant to  
225 enzalutamide treatment compared to the Trp53<sup>loxP/loxP</sup>, Rb1<sup>loxP/loxP</sup>+Empty controls (Fig.2C,D), but  
226 responded well to the combination treatment of enzalutamide and filgotinib (Fig.2C,D).  
227 Remarkably, we also observed a significant number of the Trp53<sup>loxP/loxP</sup>, Rb1<sup>loxP/loxP</sup>+Cre organoids  
228 re-established a classic lumen-like structure when treated with filgotinib compared to vehicle  
229 treated group (Fig.2C,E), indicating that JAK1 inhibition by filgotinib impairs the upregulation of

230 non-luminal transcriptional programs due to Trp53 and Rb1 depletion. This hypothesis is further  
231 supported by qPCR results showing attenuated upregulation of the basal, EMT and stem cell-like  
232 lineage genes (Fig.2F) in those organoids.

233

234 Since JAK1 depletion largely re-sensitized the sgTP53/RB1 cells to enzalutamide  
235 treatment, we next sought to determine whether JAK-STAT signaling is specifically required for  
236 the therapy resistance of heterogeneous subclones with lineage plasticity. Considering that the  
237 analysis of bulk cell RNA-Seq represents an average of gene expression across a large population  
238 of potentially heterogeneous cells expressing various lineage transcriptional programs, we  
239 performed single cell RNA-Seq and transcriptomic analysis using the LNCaP/AR sgNT,  
240 sgTP53/RB1, and sgTP53/RB1/JAK1 cell lines treated with enzalutamide or vehicle for 5 days  
241 (~10,000 cells per group). As expected, clustering of the sequenced cells was primarily driven by  
242 the genetic modifications and treatments of these cells (Fig.3A-C). Interestingly, the majority of  
243 both the sgNT and sgTP53/RB1/JAK1 cells are clearly separated by the different treatments  
244 (enzalutamide vs vehicle, as shown in Fig.3A, C), while the sgTP53/RB1 cells do not display a  
245 similar separation (mixed population shown in Fig.3B), indicating that majority of the  
246 sgTP53/RB1 cells exhibit enzalutamide resistance. Since AR antagonists can prohibit PCa cell  
247 growth by promoting cell cycle arrest (10, 44), we performed cell cycle distribution prediction  
248 analysis of each single cell using the scRNA-Seq data and observed a dramatically increased cell  
249 cycle arrest occurring in the sgNT cells treated with enzalutamide, as nearly 80% of the cells were  
250 in the G1 phase compared to less than 30% of the cells in the vehicle treated group (Fig.3A,D). In  
251 contrast, enzalutamide treatment does not increase the population of cells in G1 phase in the  
252 sgTP53/RB1 cell group, supporting that majority of the sgTP53/RB1 cells are resistant to  
253 enzalutamide-caused cell cycle arrest (Fig.3B,D). Remarkably, JAK1 depletion in the  
254 sgTP53/RB1 cells significantly increased the percentage of cells entering G1 phase upon the  
255 treatment of enzalutamide compared to the vehicle treated group (Fig.3C,D), suggesting that JAK1  
256 depletion re-sensitized those sgTP53/RB1 subpopulations to enzalutamide treatment. Notably,  
257 JAK1 depletion didn't impair the proliferation of sgTP53/RB1 cells when treated with vehicle  
258 (Fig3C,D), suggesting JAK-STAT's specific role in mediating AR targeted therapy resistance.

259

260 To further assess the dynamics of the resistance in TP53/RB1-deficient mCRPC at single  
261 cell resolution, we next investigated whether AR signaling was fully or partially restored in the  
262 resistant subclones of cells, as previously shown in many subtypes of resistant mCRPC(4). Not  
263 surprisingly, sgNT+Veh group consisted of the greatest number of cells expressing canonical AR  
264 target genes (the well-established AR-Score genes, table S2) and inhibition of their expression was  
265 subsequently verified upon enzalutamide exposure (fig.S9). In contrast, both the sgTP53/RB1-Veh  
266 and sgTP53/RB1-Enz groups predominantly lack the expression of the AR target genes, further  
267 supporting the dominant role of AR-independent transcriptional survival programs in those  
268 resistant cells (fig.S9). Interestingly, the expression of canonical AR target genes was largely re-  
269 established in many cells belonging to the sgTP53/RB1/JAK1+Veh group (two thirds of the AR-  
270 Score genes, table S2), compared to the sgTP53/RB1+Veh group (fig.S9A), suggesting a partial  
271 restoration of AR signaling and AR dependency, as well as an elevated cellular heterogeneity,  
272 among the sgTP53/RB1/JAK1 cells.

273

274 Since TP53/RB1 deficiency, as well as the deactivation of JAK-STAT signaling,  
275 significantly altered the expression of lineage-specific transcriptional programs in the bulk cell

276 population (Fig.1E-G), we surveyed how JAK-STAT signaling affected the acquisition of lineage  
277 plasticity at single cell resolution. To characterize the lineages of different cell populations, we  
278 performed unsupervised graph clustering (Uniform Manifold Approximation and Projection,  
279 UMAP)(45) and identified 6 distinct cell subsets labeled as Cluster 0-5, with further partitioning  
280 to 13 sub-clusters (Fig.3E-F). Consistent with the significant transcriptomic changes caused by  
281 TP53/RB1/JAK1 modification, 5 of the 6 clusters (clusters 0-4) predominantly overlapped with  
282 the clusters identified by genetic modifications and treatment groups (Fig.3G). Intriguingly,  
283 Cluster 5 is a mixture of a small fraction of cells from five groups: sgNT+Enz, sgTP53/RB1+Veh,  
284 sgTP53/RB1+Enz, sgTP53/RB1/JAK1+Veh, and sgTP53/RB1/JAK1+Enz (Fig.3E-G). To  
285 examine the cell proliferation status of these clusters, we overlapped the transcriptomic-based  
286 clustering with cell cycle prediction (Fig.3H). Interestingly, cells within the Cluster 0, 1, 3, and 5  
287 remain proliferative (termed the “winner” clusters, Fig.3I), whereas Cluster 2 contains a much  
288 higher percentage of cells in cell cycle arrest (termed the “loser” cluster, Fig.3I). Lastly, the cells  
289 within Cluster 4 express elevated levels of cell cycle phase heterogeneity, a finding that will be  
290 expounded upon later (Fig.3H).

291  
292 To explore the lineage characterization of these clusters, we sought to determine which of  
293 these clusters culminated in the expression of various lineage-specific transcriptional programs.  
294 We probed the well-established AR-Score gene signature and five lineage-specific gene  
295 signatures(10, 11, 46–48) (table S2) and analyzed the expression of the genes (z-score) comprising  
296 these signatures across all six clusters as well as samples of single cell subsets (Fig.4A-C). In  
297 congruence with the luminal epithelial cell lineage of the original LNCaP/AR cells, Cluster 2 and  
298 Cluster 3, consisting predominantly of cells originating from the sgNT groups, represent the two  
299 clusters expressing the highest level of the luminal gene expression (Fig.4A-D). Since the survival  
300 of these luminal epithelial cells depends on AR signaling, most of Cluster 2 cells, while retaining  
301 their luminal lineage, displayed loss of AR signaling gene expression and entered cell cycle arrest  
302 upon enzalutamide treatment (Fig.4A-E). Notably, the most substantial proportion of Cluster 0 and  
303 1, consisting primarily of cells originating from the sgTP53/RB1 groups, expressed the lowest  
304 level of luminal gene signature and relatively high levels of non-luminal lineage gene signatures  
305 compared to Cluster 3 (predominately sgNT+Veh), including the EMT, stem-like, basal, and NE-  
306 like lineage gene signatures (Fig.4A-I). Interestingly, Cluster 0 and 1 also contained a substantial  
307 proportion of cells from the sgTP53/RB1/JAK1+Veh group which maintained the expression of  
308 non-luminal transcriptional programs (Fig.4B-I), supporting the hypothesis that the deactivation  
309 of JAK-STAT signaling does not impair the general survival of those subclones in the absence of  
310 AR targeted therapy (enzalutamide) (Fig.4B-C, Fig.3I). However, enzalutamide treatment  
311 dramatically diminished the survival of sgTP53/RB1/JAK1 subclones and the expression of stem-  
312 like, EMT and basal multilineage programs, suggesting that JAK-STAT inactivation restored AR-  
313 dependency and impaired the lineage plasticity and AR therapy resistance of those subclones  
314 (Fig.4C). This hypothesis is further supported by the partially restored AR signaling in those  
315 sgTP53/RB1/JAK1 subclones (fig.S9). Interestingly, although JAK-STAT has been shown to be  
316 required for the resistance of lineage plastic subclones expressing multilineage programs,  
317 including stem-like, EMT, and basal lineages (Fig.4C), the deletion of JAK1 did not significantly  
318 impair the resistance of subclones expressing an NE-like lineage program (Fig.4C), indicating that  
319 JAK-STAT is specifically required for the de-differentiation to a stem-like and lineage plastic  
320 status, rather than following re-differentiation to the NE-like lineage in some subclones.

321

322 As the data derived from our single cell sequencing revealed clear heterogeneity within the  
323 enzalutamide treated sgTP53/RB1/JAK1 cells (Fig.3E-F), we continued to explore the lineage  
324 characterization of the subclusters of Cluster 4 (Fig.3F), which predominantly contains cells  
325 originating from the sgTP53/RB1/JAK1+Enz group (Fig.3E,G). Interestingly, the three  
326 subclusters of Cluster 4 expressed diverse levels of the JAK-STAT genes (fig.S10), presumably  
327 because the JAK-STAT signaling was not fully deactivated in a proportion of JAK1-KO cells due  
328 to compensatory signaling from other JAKs and STATs. The JAK-STAT signaling heterogeneity  
329 detected in Cluster 4 provided a unique opportunity to decipher whether the successful deactivation  
330 of JAK-STAT signaling in a subpopulation of cells would impair lineage plasticity and therapy  
331 resistance. Compared to the other subclusters of Cluster 4, Cluster 4-3, contained the “outlier”  
332 cells, which originate from the sgTP53/RB1/JAK1 group yet partially maintain JAK-STAT  
333 signaling (Fig.3F, fig.S10B-I), likely due to a compensatory activation of JAK-STAT signaling.  
334 Remarkably, Cluster 4-3 cells maintained the expression of multilineage transcriptional programs,  
335 including stem-like, EMT, basal and NE-like lineages, and remained proliferative even in the  
336 presence of enzalutamide (Fig.3F, H, Fig.4F-I, fig.S10A). By contrast, Cluster 4-1 contains cells  
337 expressing decreased levels of the multilineage transcriptional programs (Fig.3F, Fig.4F-I) and were  
338 highly responsive to the treatments of enzalutamide (Fig.3F, H, fig.S10A), suggesting an impaired  
339 AR therapy resistance in those subclones. Interestingly, Cluster 4-2 is a subclone which only  
340 maintains the NE-like genes expression, rather than the lineage plastic and multilineage  
341 transcriptional programs (Fig.3F, Fig.4I). Similarly, Cluster 4-2 also maintained active cell  
342 proliferation despite the treatment of enzalutamide (Fig.3F, H, fig.S10A), further supporting the  
343 hypothesis that JAK-STAT signaling is not required for the resistance of subclones that have  
344 already re-differentiated to an NE-like lineage. The juxtaposition between Cluster 4-1 (fully  
345 deactivated JAK-STAT signaling with impaired lineage plasticity), Cluster 4-3 (partially  
346 maintained JAK-STAT signaling and multilineage programs) and Cluster 4-2 (fully deactivated  
347 JAK-STAT signaling with impaired lineage plasticity but maintained NE-like lineage) further  
348 supports the crucial role of JAK-STAT signaling in maintaining the AR therapy resistance of stem-  
349 like and lineage plastic subclones expressing multilineage transcriptional programs, rather than the  
350 subclones fully re-differentiated to an NE-like lineage. Collectively, these results suggest that  
351 JAK-STAT signaling is a crucial executor of lineage plasticity-driven AR targeted therapy  
352 resistance in the TP53/RB1-deficient mCRPC (Fig.4J).

353  
354 Emerging evidence demonstrates that lineage plasticity represents an important mechanism  
355 for conferring targeted therapy resistance in various cancers, particularly prominent in cancers  
356 where the molecular target of therapies are the lineage-specific survival factors, including ER-  
357 positive breast cancer, EGFR-mutant lung cancer, BRAF-mutant melanoma, and AR-dependent  
358 PCa (7, 9–16, 19–22). In the case of PCa, however, it is not fully understood whether the  
359 differentiated luminal tumor cells acquire lineage plasticity-driven resistance through reverting  
360 back (de-differentiating) to a multi-lineage, stem cell-like state and then re-differentiating to  
361 alternative lineages, or through direct trans-differentiation to a distinctively new lineage (10, 18,  
362 49). Another intriguing feature of lineage plasticity-driven targeted therapy resistance is the  
363 elevated levels of intratumoral heterogeneity(50). However, average gene expression signals  
364 analyzed from bulk cell populations in previous studies may have masked the intratumoral  
365 heterogeneity, which could obstruct the dissection of the molecular mediators required either for  
366 lineage plasticity or for a specific lineage program such as NE-like lineage. Thus, the identification  
367 of heterogeneous TP53/RB1-deficient tumor cell subpopulations expressing various lineage



368 programs through single cell transcriptomic analyses illuminates these once hidden details and  
369 represents a major insight into this work. Here, by using single cell transcriptomic profiling, we  
370 showed that a vast majority of the TP53/RB1-deficient tumor cells acquire lineage plasticity by  
371 transitioning to a lineage plastic, multi-lineage, stem cell-like, and AR independent state with  
372 concurrent expression of an EMT transcriptional program *in vitro*. Importantly, our data also  
373 suggested that ectopic JAK-STAT activation is required for the AR therapy resistance of those de-  
374 differentiated, stem-like cells expressing lineage plastic and multilineage transcriptional programs,  
375 rather than the cells having undergone complete NE-like trans-differentiation.

376  
377 Various genetic and transcriptional aberrations have been connected to the acquisition of  
378 lineage plasticity in PCa, including, but not limited to, the aberrations of PTEN, BRN2, FOXA1,  
379 N-Myc, PEG10, CHD1, REST, and BRG1 (7, 11–16). Interestingly, many of those cases involve  
380 the “hijacking” of stem-like, pluripotency, or epigenetic regulation programs, such as SOX2,  
381 SOX11, EZH2, and the SWI/SNF complex (9, 10, 13–15, 18). Although the role of JAK-STAT  
382 signaling pathway in regulating cell fate decision, stem cell self-renewal, and multilineage  
383 differentiation has been well documented (23–25), its potential function in mediating lineage  
384 plasticity-driven AR therapy resistance remained largely unclear. Here, our results indicate a  
385 significant role of JAK-STAT signaling in TP53/RB1 deficient tumor cells, whereby the activation  
386 of the pathway promotes the transition of luminal epithelial cells to a multilineage, stem cell-like,  
387 and EMT status. These results are consistent with previous findings that JAK-STAT promotes  
388 EMT transition and tumor metastasis, often through the induction of pluripotency signaling  
389 transduction, in uveal melanoma, colorectal, breast, head and neck, and prostate cancers(37, 38,  
390 51–54).

391  
392 Although the oncogenic roles of JAK-STAT signaling, including the activation of STAT1,  
393 STAT3 and STAT5, have been widely corroborated in various cancers including PCa, the exact  
394 biological consequence of constitutive activation of those STAT proteins in tumorigenesis is  
395 highly context specific(28). For example, IL6-induced STAT3 activation has been reported to  
396 promote PCa NE-like differentiation and cell cycle arrest(29–31), while also protecting PCa cell  
397 from apoptosis caused by AR inhibition(32–36). Similarly, despite its known function in  
398 mediating antitumor immune surveillance, ectopic expression of STAT1 confers radioresistance  
399 in squamous cell carcinoma and chemotherapy resistance in colon cancer(28, 55, 56). Here, we  
400 showed that the JAK-STAT signaling activation, partially in a STAT1-dependent manner, is  
401 required for the lineage plasticity-driven AR therapy resistance in TP53/RB1-deficient tumors, but  
402 not for the tumor cells which have completely re-differentiated to an NE-like lineage. Our data  
403 also indicated that the JAK-STAT signaling enables the expression of EMT transition lineage  
404 program which promotes a metastatic phenotype of the resistant cells. This mechanism parallels  
405 the behavior of p53-deficient esophageal tumors, which demonstrates that ectopic upregulation of  
406 STAT1 promotes tumor metastasis and invasion(57). Such correlations between STAT1 and the  
407 activation of EMT transcriptional programs have also been observed in triple negative breast  
408 cancer and colon cancer (55, 58). Furthermore, our single cell analysis showed that the JAK-STAT  
409 signaling was not completely deactivated in a subset of cells originating in the sgTP53/RB1/JAK1  
410 group, which suggests the possibility that various JAK and STAT proteins function in a  
411 collaborative and compensatory network.

412

413 It is important to place our model of how JAK-STAT signaling is hijacked to promote  
414 lineage plasticity, EMT transition, and resistance in the context of TP53 and RB1 deficiency (42).  
415 Accumulating evidence suggests a connection between JAK-STAT activation and TP53/RB1  
416 alterations in various cancers. In EGFR-mutant lung cancer, concurrent TP53/RB1 alterations  
417 define a subset of tumors with small cell lung cancer (SCLC) transformation, which contains  
418 significantly enriched mutation frequencies in the JAK-STAT signaling pathway(59). However,  
419 others have documented an inverse correlation between wildtype TP53 and JAK-STAT activation.  
420 For example, wildtype TP53 is reported to inhibit the transcriptional activity of both STAT3 and  
421 STAT5 in myeloproliferative neoplasms (MPNs)(60, 61), the latter of which prevents STAT5 from  
422 binding to lineage specific factors which drive differentiation (62). These results are consistent  
423 with our finding that the inactivation of JAK-STAT signaling dramatically impairs the  
424 proliferation of resistant cells with TP53/RB1-deficiency, while not affecting the cells with intact  
425 TP53 and RB1 (fig.S4C). Therefore, it is critical to consider the genomic status of TP53/RB1 when  
426 correlating JAK-STAT activation with the clinical outcome of AR therapy responses, as the JAK-  
427 STAT activation in patients with wildtype TP53/RB1 may not be a consequence of lineage  
428 “hijacking,” but rather cytokine-induced immune response. However, this extrapolation would  
429 require the analysis of a much larger cohort of mCRPC patients carrying TP53/RB1 alterations.

430  
431 Despite the clinical success of AR targeted therapies in controlling mCRPC, acquired  
432 resistance to these treatments universally develops and largely impairs the clinical outcome of  
433 patients with mCRPC. Although lineage plasticity-driven resistance has been suggested as a  
434 substantial mechanism conferring resistance and several underlying mechanisms have been  
435 revealed, effective therapeutic approaches for patients with resistant mCRPC driven by lineage  
436 plasticity are still not available. Although our previous discovery reveals an important role of  
437 SOX2 in mediating lineage plasticity(10), direct pharmacological inhibition of SOX2 is not  
438 currently feasible, underscoring the unmet need to develop novel combination therapies targeting  
439 lineage plasticity in this subtype of lethal mCRPC with TP53/RB1-deficiency. Here, using various  
440 human mCRPC cell models and 3D-cultured organoid model, we demonstrated the efficacy of  
441 JAK1 inhibitor filgotinib, in combination with enzalutamide, to overcome the lineage plasticity-  
442 driven resistance in TP53/RB1-deficient mCRPC. These results may provide strong rationale for  
443 future clinical trials designed to target JAK-STAT signaling for overcoming lineage plasticity-  
444 driven AR targeted therapy resistance.

445 **References and Notes:**

446

- 447 1. T. M. Beer, A. J. Armstrong, D. E. Rathkopf, Y. Loriot, C. N. Sternberg, C. S. Higano, P. Iversen,  
448 S. Bhattacharya, J. Carles, S. Chowdhury, I. D. Davis, J. S. de Bono, C. P. Evans, K. Fizazi, A. M.  
449 Joshua, C.-S. Kim, G. Kimura, P. Mainwaring, H. Mansbach, K. Miller, S. B. Noonberg, F. Perabo,  
450 D. Phung, F. Saad, H. I. Scher, M.-E. Taplin, P. M. Venner, B. Tombal, P. Investigators,  
451 Enzalutamide in Metastatic Prostate Cancer before Chemotherapy. *New Engl J Medicine*. 371,  
452 424–433 (2014).
- 453 2. C. J. Ryan, M. R. Smith, J. S. de Bono, A. Molina, C. J. Logothetis, P. de Souza, K. Fizazi, P.  
454 Mainwaring, J. M. Piulats, S. Ng, J. Carles, P. F. A. Mulders, E. Basch, E. J. Small, F. Saad, D.  
455 Schrijvers, H. V. Poppel, S. D. Mukherjee, H. Suttman, W. R. Gerritsen, T. W. Flaig, D. J. George,  
456 E. Y. Yu, E. Efstathiou, A. Pantuck, E. Winquist, C. S. Higano, M.-E. Taplin, Y. Park, T. Kheoh,  
457 T. Griffin, H. I. Scher, D. E. Rathkopf, C.-A.-302 Investigators, Abiraterone in Metastatic Prostate  
458 Cancer without Previous Chemotherapy. *New Engl J Medicine*. 368, 138–148 (2013).
- 459 3. M. R. Smith, F. Saad, S. Chowdhury, S. Oudard, B. A. Hadaschik, J. N. Graff, D. Olmos, P. N.  
460 Mainwaring, J. Y. Lee, H. Uemura, A. Lopez-Gitlitz, G. C. Trudel, B. M. Espina, Y. Shu, Y. C.  
461 Park, W. R. Rackoff, M. K. Yu, E. J. Small, Apalutamide Treatment and Metastasis-free Survival  
462 in Prostate Cancer. *New Engl J Medicine*. 378, 1408–1418 (2018).
- 463 4. P. A. Watson, V. K. Arora, C. L. Sawyers, *Nat Rev Cancer*, in press, doi:10.1038/nrc4016.
- 464 5. V. K. Arora, E. Schenkein, R. Murali, S. K. Subudhi, J. Wongvipat, M. D. Balbas, N. Shah, L.  
465 Cai, E. Efstathiou, C. Logothetis, D. Zheng, C. L. Sawyers, *Cell*, in press,  
466 doi:10.1016/j.cell.2013.11.012.
- 467 6. M. Isikbay, K. Otto, S. Kregel, J. Kach, Y. Cai, D. J. V. Griend, S. D. Conzen, R. Z. Szmulewitz,  
468 Glucocorticoid Receptor Activity Contributes to Resistance to Androgen-Targeted Therapy in  
469 Prostate Cancer. *Hormones Cancer*. 5, 72–89 (2014).
- 470 7. Z. Zhang, C. Zhou, X. Li, S. D. Barnes, S. Deng, E. Hoover, C.-C. Chen, Y. S. Lee, Y. Zhang,  
471 C. Wang, L. A. Metang, C. Wu, C. R. Tirado, N. A. Johnson, J. Wongvipat, K. Navrazhina, Z.  
472 Cao, D. Choi, C.-H. Huang, E. Linton, X. Chen, Y. Liang, C. E. Mason, E. de Stanchina, W. Abida,  
473 A. Lujambio, S. Li, S. W. Lowe, J. T. Mendell, V. S. Malladi, C. L. Sawyers, P. Mu, Loss of  
474 CHD1 Promotes Heterogeneous Mechanisms of Resistance to AR-Targeted Therapy via  
475 Chromatin Dysregulation. *Cancer Cell* (2020), doi:10.1016/j.ccell.2020.03.001.
- 476 8. H. Beltran, A. Hruszkewycz, H. I. Scher, J. Hildesheim, J. Isaacs, E. Y. Yu, K. Kelly, D. Lin,  
477 A. Dicker, J. Arnold, T. Hecht, M. Wicha, R. Sears, D. Rowley, R. White, J. L. Gulley, J. Lee, M.  
478 D. Meco, E. J. Small, M. Shen, K. Knudsen, D. W. Goodrich, T. Lotan, A. Zoubeidi, C. L. Sawyers,  
479 C. M. Rudin, M. Loda, T. Thompson, M. A. Rubin, A. Tawab-Amiri, W. Dahut, P. S. Nelson, The  
480 Role of Lineage Plasticity in Prostate Cancer Therapy Resistance. *Clin Cancer Res*. 25, 6916–  
481 6924 (2019).
- 482 9. S. Y. Ku, S. Rosario, Y. Wang, P. Mu, M. Seshadri, Z. W. Goodrich, M. M. Goodrich, D. P.  
483 Labbé, E. C. Gomez, J. Wang, H. W. Long, B. Xu, M. Brown, M. Loda, C. L. Sawyers, L. Ellis,  
484 D. W. Goodrich, *Science*, in press, doi:10.1126/science.aah4199.
- 485 10. P. Mu, Z. Zhang, M. Benelli, W. R. Karthaus, E. Hoover, C.-C. Chen, J. Wongvipat, S. Y. Ku,  
486 D. Gao, Z. Cao, N. Shah, E. J. Adams, W. Abida, P. A. Watson, D. Prandi, C.-H. Huang, E. de  
487 Stanchina, S. W. Lowe, L. Ellis, H. Beltran, M. A. Rubin, D. W. Goodrich, F. Demichelis, C. L.  
488 Sawyers, *Science*, in press, doi:10.1126/science.aah4307.

- 489 11. H. Beltran, D. Prandi, J.-M. Mosquera, M. Benelli, L. Puca, J. Cyrta, C. Marotz, E.  
490 Giannopoulou, B. V. S. K. Chakravarthi, S. Varambally, S. A. Tomlins, D. M. Nanus, S. T. Tagawa,  
491 E. M. V. Allen, O. Elemento, A. Sboner, L. A. Garraway, M. A. Rubin, F. Demichelis, *Nat Med*,  
492 in press, doi:10.1038/nm.4045.
- 493 12. E. Dardenne, H. Beltran, M. Benelli, K. Gayvert, A. Berger, L. Puca, J. Cyrta, A. Sboner, Z.  
494 Noorzad, T. MacDonald, C. Cheung, K. S. Yuen, D. Gao, Y. Chen, M. Eilers, J.-M. Mosquera, B.  
495 D. Robinson, O. Elemento, M. A. Rubin, F. Demichelis, D. S. Rickman, N-Myc Induces an EZH2-  
496 Mediated Transcriptional Program Driving Neuroendocrine Prostate Cancer. *Cancer Cell*. 30,  
497 563–577 (2016).
- 498 13. J. L. Bishop, D. Thaper, S. Vahid, A. Davies, K. Ketola, H. Kuruma, R. Jama, K. M. Nip, A.  
499 Angeles, F. Johnson, A. W. Wyatt, L. Fazli, M. E. Gleave, D. Lin, M. A. Rubin, C. C. Collins, Y.  
500 Wang, H. Beltran, A. Zoubeidi, The Master Neural Transcription Factor BRN2 Is an Androgen  
501 Receptor–Suppressed Driver of Neuroendocrine Differentiation in Prostate Cancer. *Cancer Discov*.  
502 7, 54–71 (2017).
- 503 14. J. Cyrta, A. Augspach, M. R. de Filippo, D. Prandi, P. Thienger, M. Benelli, V. Cooley, R.  
504 Bareja, D. Wilkes, S.-S. Chae, P. Cavaliere, N. Dephoure, A.-C. Uldry, S. B. Lagache, S. Cohen,  
505 M. Jaquet, L. P. Brandt, M. Alshalalfa, A. Sboner, F. Feng, S. Wang, H. Beltran, T. Lotan, M.  
506 Spahn, M. K. Julio, Y. Chen, K. V. Ballman, F. Demichelis, S. Piscuoglio, M. A. Rubin, *Biorxiv*,  
507 in press, doi:10.1101/2020.03.06.949131.
- 508 15. M. Zou, R. Toivanen, A. Mitrofanova, N. Floc'h, S. Hayati, Y. Sun, C. L. Magnen, D. Chester,  
509 E. A. Mostaghel, A. Califano, M. A. Rubin, M. M. Shen, C. Abate-Shen, Transdifferentiation as a  
510 Mechanism of Treatment Resistance in a Mouse Model of Castration-resistant Prostate Cancer.  
511 *Cancer Discov*. 7, 736–749 (2017).
- 512 16. X. Zhang, I. M. Coleman, L. G. Brown, L. D. True, L. Kollath, J. M. Lucas, H.-M. Lam, R.  
513 Dumpit, E. Corey, L. Chéry, B. Lakely, C. S. Higano, B. Montgomery, M. Roudier, P. H. Lange,  
514 P. S. Nelson, R. L. Vessella, C. Morrissey, SRRM4 Expression and the Loss of REST Activity  
515 May Promote the Emergence of the Neuroendocrine Phenotype in Castration-Resistant Prostate  
516 Cancer. *Am Assoc Cancer Res*. 21, 4698–4708 (2015).
- 517 17. E. J. Adams, W. R. Karthaus, E. Hoover, D. Liu, A. Gruet, Z. Zhang, H. Cho, R. DiLoreto, S.  
518 Chhangawala, Y. Liu, P. A. Watson, E. Davicioni, A. Sboner, C. E. Barbieri, R. Bose, C. S. Leslie,  
519 C. L. Sawyers, FOXA1 mutations alter pioneering activity, differentiation and prostate cancer  
520 phenotypes. *Nature*. 571, 408–412 (2019).
- 521 18. A. Davies, S. Nouruzi, D. Ganguli, T. Namekawa, D. Thaper, S. Linder, F. Karaođlanođlu, M.  
522 E. Omur, S. Kim, M. Kobelev, S. Kumar, O. Sivak, C. Bostock, J. Bishop, M. Hoogstraat, A. Talal,  
523 S. Stelloo, H. van der Poel, A. M. Bergman, M. Ahmed, L. Fazli, H. Huang, W. Tilley, D. Goodrich,  
524 F. Y. Feng, M. Gleave, H. H. He, F. Hach, W. Zwart, H. Beltran, L. Selth, A. Zoubeidi, An  
525 androgen receptor switch underlies lineage infidelity in treatment-resistant prostate cancer. *Nat*  
526 *Cell Biol*. 23, 1023–1034 (2021).
- 527 19. L. A. Garraway, H. R. Widlund, M. A. Rubin, G. Getz, A. J. Berger, S. Ramaswamy, R.  
528 Beroukhim, D. A. Milner, S. R. Granter, J. Du, C. Lee, S. N. Wagner, C. Li, T. R. Golub, D. L.  
529 Rimm, M. L. Meyerson, D. E. Fisher, W. R. Sellers, Integrative genomic analyses identify MITF  
530 as a lineage survival oncogene amplified in malignant melanoma. *Nature*. 436, 117 (2005).
- 531 20. J. W. Park, J. K. Lee, K. M. Sheu, L. Wang, N. G. Balanis, K. Nguyen, B. A. Smith, C. Cheng,  
532 B. L. Tsai, D. Cheng, J. Huang, S. K. Kurdistani, T. G. Graeber, O. N. Witte, Reprogramming  
533 normal human epithelial tissues to a common, lethal neuroendocrine cancer lineage. *Science*. 362,  
534 91–95 (2018).

- 535 21. L. V. Sequist, B. A. Waltman, D. Dias-Santagata, S. Digumarthy, A. B. Turke, P. Fidias, K.  
536 Bergethon, A. T. Shaw, S. Gettinger, A. K. Cosper, S. Akhavanfard, R. S. Heist, J. Temel, J. G.  
537 Christensen, J. C. Wain, T. J. Lynch, K. Vernovsky, E. J. Mark, M. Lanuti, A. J. Iafrate, M. Mino-  
538 Kenudson, J. A. Engelman, *Sci Transl Med*, in press, doi:10.1126/scitranslmed.3002003.
- 539 22. G. Xu, S. Chhangawala, E. Cocco, P. Razavi, Y. Cai, J. E. Otto, L. Ferrando, P. Selenica, E.  
540 Ladewig, C. Chan, A. D. C. Paula, M. Witkin, Y. Cheng, J. Park, C. Serna-Tamayo, H. Zhao, F.  
541 Wu, M. Sallaku, X. Qu, A. Zhao, C. K. Collings, A. R. D'Avino, K. Jhaveri, R. Koche, R. L.  
542 Levine, J. S. Reis-Filho, C. Kadoch, M. Scaltriti, C. S. Leslie, J. Baselga, E. Toska, ARID1A  
543 determines luminal identity and therapeutic response in estrogen-receptor-positive breast cancer.  
544 *Nat Genet.* 52, 198–207 (2020).
- 545 23. S. J. Thomas, J. A. Snowden, M. P. Zeidler, S. J. Danson, The role of JAK/STAT signalling  
546 in the pathogenesis, prognosis and treatment of solid tumours. *Brit J Cancer.* 113, 365–371 (2015).
- 547 24. S. R. SINGH, X. CHEN, S. X. HOU, JAK/STAT signaling regulates tissue outgrowth and  
548 male germline stem cell fate in *Drosophila*. *Cell Res.* 15, 1–5 (2005).
- 549 25. K. Beebe, W.-C. Lee, C. A. Micchelli, JAK/STAT signaling coordinates stem cell proliferation  
550 and multilineage differentiation in the *Drosophila* intestinal stem cell lineage. *Dev Biol.* 338, 28–  
551 37 (2010).
- 552 26. T. Mirtti, B. E. Leiby, J. Abdulghani, E. Aaltonen, M. Paveola, A. Mamtani, K. Alanen, L.  
553 Egevad, T. Granfors, A. Josefsson, P. Stattin, A. Bergh, M. T. Nevalainen, Nuclear Stat5a/b  
554 predicts early recurrence and prostate cancer-specific death in patients treated by radical  
555 prostatectomy. *Hum Pathol.* 44, 310–319 (2013).
- 556 27. K. L. Owen, N. K. Brockwell, B. S. Parker, JAK-STAT Signaling: A Double-Edged Sword of  
557 Immune Regulation and Cancer Progression. *Cancers.* 11, 2002 (2019).
- 558 28. K. Meissl, S. Macho-Maschler, M. Müller, B. Strobl, The good and the bad faces of STAT1 in  
559 solid tumours. *Cytokine.* 89, 12–20 (2017).
- 560 29. M. T. Spiotto, T. D. K. Chung, STAT3 mediates IL-6-induced neuroendocrine differentiation  
561 in prostate cancer cells. *Prostate.* 42, 186–195 (2000).
- 562 30. Y. Zhu, C. Liu, Y. Cui, N. Nadiminty, W. Lou, A. C. Gao, Interleukin-6 induces  
563 neuroendocrine differentiation (NED) through suppression of RE-1 silencing transcription factor  
564 (REST). *Prostate.* 74, 1086–1094 (2014).
- 565 31. J. Kim, R. M. Adam, K. R. Solomon, M. R. Freeman, Involvement of Cholesterol-Rich Lipid  
566 Rafts in Interleukin-6-Induced Neuroendocrine Differentiation of LNCaP Prostate Cancer Cells.  
567 *Endocrinology.* 145, 613–619 (2004).
- 568 32. S. O. Lee, J. Y. Chun, N. Nadiminty, W. Lou, A. C. Gao, Interleukin-6 undergoes transition  
569 from growth inhibitor associated with neuroendocrine differentiation to stimulator accompanied  
570 by androgen receptor activation during LNCaP prostate cancer cell progression. *Prostate.* 67, 764–  
571 773 (2007).
- 572 33. S. O. Lee, W. Lou, C. S. Johnson, D. L. Trump, A. C. Gao, Interleukin-6 protects LNCaP cells  
573 from apoptosis induced by androgen deprivation through the Stat3 pathway. *Prostate.* 60, 178–  
574 186 (2004).
- 575 34. S. O. Lee, W. Lou, M. Hou, F. de Miguel, L. Gerber, A. C. Gao, Interleukin-6 promotes  
576 androgen-independent growth in LNCaP human prostate cancer cells. *Clin Cancer Res Official J*  
577 *Am Assoc Cancer Res.* 9, 370–6 (2003).
- 578 35. C. Liu, W. Lou, C. Armstrong, Y. Zhu, C. P. Evans, A. C. Gao, Niclosamide suppresses cell  
579 migration and invasion in enzalutamide resistant prostate cancer cells via Stat3-AR axis inhibition.  
580 *Prostate.* 75, 1341–1353 (2015).

- 581 36. C. Liu, Y. Zhu, W. Lou, Y. Cui, C. P. Evans, A. C. Gao, Inhibition of constitutively active  
582 Stat3 reverses enzalutamide resistance in LNCaP derivative prostate cancer cells. *Prostate*. 74,  
583 201–209 (2014).
- 584 37. K. H. Cho, K. J. Jeong, S. C. Shin, J. Kang, C. G. Park, H. Y. Lee, STAT3 mediates TGF- $\beta$ 1-  
585 induced TWIST1 expression and prostate cancer invasion. *Cancer Lett*. 336, 167–173 (2013).
- 586 38. A. Rojas, G. Liu, I. Coleman, P. S. Nelson, M. Zhang, R. Dash, P. B. Fisher, S. R. Plymate, J.  
587 D. Wu, IL-6 promotes prostate tumorigenesis and progression through autocrine cross-activation  
588 of IGF-IR. *Oncogene*. 30, 2345–2355 (2011).
- 589 39. M. Sun, C. Liu, N. Nadiminty, W. Lou, Y. Zhu, J. Yang, C. P. Evans, Q. Zhou, A. C. Gao,  
590 Inhibition of Stat3 activation by sanguinarine suppresses prostate cancer cell growth and invasion.  
591 *Prostate*. 72, 82–89 (2012).
- 592 40. F. DeMiguel, S. O. Lee, W. Lou, X. Xiao, B. R. Pflug, J. B. Nelson, A. C. Gao, Stat3 enhances  
593 the growth of LNCaP human prostate cancer cells in intact and castrated male nude mice. *Prostate*.  
594 52, 123–129 (2002).
- 595 41. S. O. Lee, W. Lou, K. M. Qureshi, F. Mehraein-Ghomi, D. L. Trump, A. C. Gao, RNA  
596 interference targeting Stat3 inhibits growth and induces apoptosis of human prostate cancer cells.  
597 *Prostate*. 60, 303–309 (2004).
- 598 42. W. Abida, J. Cyrta, G. Heller, D. Prandi, J. Armenia, I. Coleman, M. Cieslik, M. Benelli, D.  
599 Robinson, E. M. V. Allen, A. Sboner, T. Fedrizzi, J. M. Mosquera, B. D. Robinson, N. D. Sarkar,  
600 L. P. Kunju, S. Tomlins, Y. M. Wu, D. N. Rodrigues, M. Loda, A. Gopalan, V. E. Reuter, C. C.  
601 Pritchard, J. Mateo, D. Bianchini, S. Miranda, S. Carreira, P. Rescigno, J. Filipenko, J. Vinson, R.  
602 B. Montgomery, H. Beltran, E. I. Heath, H. I. Scher, P. W. Kantoff, M.-E. Taplin, N. Schultz, J.  
603 S. deBono, F. Demichelis, P. S. Nelson, M. A. Rubin, A. M. Chinnaiyan, C. L. Sawyers, Genomic  
604 correlates of clinical outcome in advanced prostate cancer. *Proc National Acad Sci*, 201902651  
605 (2019).
- 606 43. C. G. A. R. Network, *Cell*, in press, doi:10.1016/j.cell.2015.10.025.
- 607 44. W. Hessenkemper, J. Roediger, S. Bartsch, A. B. Houtsmuller, M. E. van Royen, I. Petersen,  
608 M.-O. Grimm, A. Baniahmad, A Natural Androgen Receptor Antagonist Induces Cellular  
609 Senescence in Prostate Cancer Cells. *Mol Endocrinol*. 28, 1831–1840 (2014).
- 610 45. L. McInnes, J. Healy, J. Melville, UMAP: Uniform Manifold Approximation and Projection  
611 for Dimension Reduction. *Arxiv* (2018).
- 612 46. D. Zhang, D. Park, Y. Zhong, Y. Lu, K. Rycaj, S. Gong, X. Chen, X. Liu, H.-P. Chao, P.  
613 Whitney, T. Calhoun-Davis, Y. Takata, J. Shen, V. R. Iyer, D. G. Tang, Stem cell and neurogenic  
614 gene-expression profiles link prostate basal cells to aggressive prostate cancer. *Nat Commun*. 7,  
615 10798 (2016).
- 616 47. B. Dong, J. Miao, Y. Wang, W. Luo, Z. Ji, H. Lai, M. Zhang, X. Cheng, J. Wang, Y. Fang, H.  
617 H. Zhu, C. W. Chua, L. Fan, Y. Zhu, J. Pan, J. Wang, W. Xue, W.-Q. Gao, Single-cell analysis  
618 supports a luminal-neuroendocrine transdifferentiation in human prostate cancer. *Commun*  
619 *Biology*. 3, 778 (2020).
- 620 48. H. Hieronymus, J. Lamb, K. N. Ross, X. P. Peng, C. Clement, A. Rodina, M. Nieto, J. Du, K.  
621 Stegmaier, S. M. Raj, K. N. Maloney, J. Clardy, W. C. Hahn, G. Chiosis, T. R. Golub, Gene  
622 expression signature-based chemical genomic prediction identifies a novel class of HSP90  
623 pathway modulators. *Cancer Cell*. 10, 321–330 (2006).
- 624 49. M. D. Nyquist, A. Corella, I. Coleman, N. D. Sarkar, A. Kaipainen, G. Ha, R. Gulati, L. Ang,  
625 P. Chatterjee, J. Lucas, C. Pritchard, G. Risbridger, J. Isaacs, B. Montgomery, C. Morrissey, E.  
626 Corey, P. S. Nelson, Combined TP53 and RB1 Loss Promotes Prostate Cancer Resistance to a

- 627 Spectrum of Therapeutics and Confers Vulnerability to Replication Stress. *Cell Reports*. 31,  
628 107669 (2020).
- 629 50. I. Dagogo-Jack, A. T. Shaw, Tumour heterogeneity and resistance to cancer therapies. *Nat Rev*  
630 *Clin Oncol*. 15, 81–94 (2017).
- 631 51. C. Yao, L. Su, J. Shan, C. Zhu, L. Liu, C. Liu, Y. Xu, Z. Yang, X. Bian, J. Shao, J. Li, M. Lai,  
632 J. Shen, C. Qian, IGF/STAT3/NANOG/Slug Signaling Axis Simultaneously Controls Epithelial-  
633 Mesenchymal Transition and Stemness Maintenance in Colorectal Cancer. *Stem Cells*. 34, 820–  
634 831 (2016).
- 635 52. A. Yadav, B. Kumar, J. Datta, T. N. Teknos, P. Kumar, IL-6 Promotes Head and Neck Tumor  
636 Metastasis by Inducing Epithelial–Mesenchymal Transition via the JAK-STAT3-SNAIL  
637 Signaling Pathway. *Mol Cancer Res*. 9, 1658–1667 (2011).
- 638 53. H. Xiong, J. Hong, W. Du, Y. Lin, L. Ren, Y. Wang, W. Su, J. Wang, Y. Cui, Z. Wang, J.-Y.  
639 Fang, Roles of STAT3 and ZEB1 Proteins in E-cadherin Down-regulation and Human Colorectal  
640 Cancer Epithelial-Mesenchymal Transition\*. *J Biol Chem*. 287, 5819–5832 (2012).
- 641 54. C. Gong, J. Shen, Z. Fang, L. Qiao, R. Feng, X. Lin, S. Li, Abnormally expressed JunB  
642 transactivated by IL-6/STAT3 signaling promotes uveal melanoma aggressiveness via epithelial-  
643 mesenchymal transition. *Bioscience Rep*. 38 (2018), doi:10.1042/bsr20180532.
- 644 55. W. MALILAS, S. S. KOH, S. KIM, R. SRISUTTEE, I.-R. CHO, J. MOON, H.-S. YOO, S.  
645 OH, R. N. JOHNSTON, Y.-H. CHUNG, Cancer upregulated gene 2, a novel oncogene, enhances  
646 migration and drug resistance of colon cancer cells via STAT1 activation. *Int J Oncol*. 43, 1111–  
647 1116 (2013).
- 648 56. N. N. Khodarev, M. Beckett, E. Labay, T. Darga, B. Roizman, R. R. Weichselbaum, STAT1  
649 is overexpressed in tumors selected for radioresistance and confers protection from radiation in  
650 transduced sensitive cells. *P Natl Acad Sci Usa*. 101, 1714–1719 (2004).
- 651 57. G. S. Wong, J.-S. Lee, Y.-Y. Park, A. J. Klein-Szanto, T. J. Waldron, E. Cukierman, M. Herlyn,  
652 P. Gimotty, H. Nakagawa, A. K. Rustgi, Periostin cooperates with mutant p53 to mediate invasion  
653 through the induction of STAT1 signaling in the esophageal tumor microenvironment.  
654 *Oncogenesis*. 2, e59–e59 (2013).
- 655 58. C. Greenwood, G. Metodieva, K. Al-Janabi, B. Lausen, L. Alldridge, L. Leng, R. Bucala, N.  
656 Fernandez, M. V. Metodiev, Stat1 and CD74 overexpression is co-dependent and linked to  
657 increased invasion and lymph node metastasis in triple-negative breast cancer. *J Proteomics*. 75,  
658 3031–3040 (2012).
- 659 59. M. Offin, J. M. Chan, M. Tenet, H. A. Rizvi, R. Shen, G. J. Riely, N. Rekhtman, Y. Daneshbod,  
660 A. Quintanal-Villalonga, A. Penson, M. D. Hellmann, M. E. Arcila, M. Ladanyi, D. Pe’er, M. G.  
661 Kris, C. M. Rudin, H. A. Yu, Concurrent RB1 and TP53 Alterations Define a Subset of EGFR-  
662 Mutant Lung Cancers at risk for Histologic Transformation and Inferior Clinical Outcomes. *J*  
663 *Thorac Oncol*. 14, 1784–1793 (2019).
- 664 60. M. Girardot, C. Pecquet, I. Chachoua, J. V. Hees, S. Guibert, A. Ferrant, L. Knoops, E. J.  
665 Baxter, P. A. Beer, S. Giraudier, R. Moriggl, W. Vainchenker, A. R. Green, S. N. Constantinescu,  
666 Persistent STAT5 activation in myeloid neoplasms recruits p53 into gene regulation. *Oncogene*.  
667 34, 1323–1332 (2015).
- 668 61. E. Colombo, J.-C. Marine, D. Danovi, B. Falini, P. G. Pelicci, Nucleophosmin regulates the  
669 stability and transcriptional activity of p53. *Nat Cell Biol*. 4, 529–533 (2002).
- 670 62. H. J. Park, J. Li, R. Hannah, S. Biddie, A. I. Leal-Cervantes, K. Kirschner, D. F. S. Cruz, V.  
671 Sexl, B. Göttgens, A. R. Green, Cytokine-induced megakaryocytic differentiation is regulated by  
672 genome-wide loss of a uSTAT transcriptional program. *Embo J*. 35, 580–594 (2016).

- 673 63. C. D. Chen, D. S. Welsbie, C. Tran, S. H. Baek, R. Chen, R. Vessella, M. G. Rosenfeld, C. L.  
674 Sawyers, *Nat Med*, in press, doi:10.1038/nm972.
- 675 64. K. A. Klein, R. E. Reiter, J. Redula, H. Moradi, X. L. Zhu, A. R. Brothman, D. J. Lamb, M.  
676 Marcelli, A. Belldegrün, O. N. Witte, C. L. Sawyers, Progression of metastatic human prostate  
677 cancer to androgen independence in immunodeficient SCID mice. *Nat Med*. 3, 402–408 (1997).
- 678 65. W. R. Karthaus, P. J. Iaquinta, J. Drost, A. Gracanin, R. van Boxtel, J. Wongvipat, C. M.  
679 Dowling, D. Gao, H. Begthel, N. Sachs, R. G. J. Vries, E. Cuppen, Y. Chen, C. L. Sawyers, H. C.  
680 Clevers, *Cell*, in press, doi:10.1016/j.cell.2014.08.017.
- 681 66. D. Gao, I. Vela, A. Sboner, P. J. Iaquinta, W. R. Karthaus, A. Gopalan, C. Dowling, J. N.  
682 Wanjala, E. A. Undvall, V. K. Arora, J. Wongvipat, M. Kossai, S. Ramazanoglu, L. P. Barboza,  
683 W. Di, Z. Cao, Q. F. Zhang, I. Sirota, L. Ran, T. Y. MacDonald, H. Beltran, J.-M. Mosquera, K.  
684 A. Touijer, P. T. Scardino, V. P. Laudone, K. R. Curtis, D. E. Rathkopf, M. J. Morris, D. C. Danila,  
685 S. F. Slovin, S. B. Solomon, J. A. Eastham, P. Chi, B. Carver, M. A. Rubin, H. I. Scher, H. Clevers,  
686 C. L. Sawyers, Y. Chen, *Cell*, in press, doi:10.1016/j.cell.2014.08.016.
- 687 67. D. B. Wheeler, R. Zoncu, D. E. Root, D. M. Sabatini, C. L. Sawyers, *Science*, in press,  
688 doi:10.1126/science.aaa4903.
- 689 68. F. A. Wolf, P. Angerer, F. J. Theis, SCANPY: large-scale single-cell gene expression data  
690 analysis. *Genome Biol*. 19, 15 (2018).
- 691 69. V. A. Traag, L. Waltman, N. J. van Eck, From Louvain to Leiden: guaranteeing well-connected  
692 communities. *Sci Rep-uk*. 9, 5233 (2019).

#### 693 **Acknowledgments:**

694 We thank the SU2C, TCGA, cBioPortal.org, and Firehose Legacy (Firebrowse.org) for providing  
695 genomic and transcriptomic data. We thank Dr. Charles L. Sawyers for some of the reagents used  
696 in this study. We thank Drs. Kathryn O'Donnell, Michael Buszczak and Ganesh Raj for helpful  
697 discussion.

698

699 **Funding:** This work was supported or partially supported by

700 National Cancer Institute/National Institutes of Health (5R00CA218885 and 1R37CA258730  
701 P.M., 1P30CA142543, 1R01CA258584 T.W., 1R01CA245318 B.L., R01CA178431 DJ V. G.)

702 Department of Defense (W81XWH-18-1-0411 and W81XWH21-1-0520 P.M., W81XWH-16-1-  
703 0474 J.T.H., W81XWH2110418 XL.L.)

704 Cancer Prevention Research Institute (CPRIT) (RR170050 P.M., RP190208 T.W., RR170079  
705 B.L.)

706 Prostate Cancer Foundation (17YOUN12 P.M.)

707 Welch Foundation (I-2005-20190330 P.M.)

708 UTSW Deborah and W.A. Tex Moncrief, Jr. Scholar in Medical Research Award (P.M.)

709 UTSW Harold C. Simmons Cancer Center Pilot Award (P.M.)

710 UTSW CCSG Data Science Shared Resources (DSSR, T.W.).

711

#### 712 **Author contributions:**

713 S.D. and P.M. conceived the project.

714 S.D., CS.W, YG.W. and P.M. designed, conducted experiments and interpreted data.

715 S.D. and P.M. co-wrote the manuscript. L.M. and N.J. edited the manuscript.

716 S.D., CS.W. and XL.L. conducted all genetic and pharmaceutical inactivation of JAK-STAT  
717 signaling in all the *in vitro* assays.



718 S.D., CS.W. and N.J. performed all in vivo xenograft experiments.  
719 XL.L., K.R., J.J. and P.M. performed all organoids experiments.  
720 YR.X., J.G. and S.D. performed all ChIP and migration assay experiments.  
721 S.D., CS.W., XL.L., C.R.T. and V.A. performed all qPCR and western blot experiments.  
722 LF.X., UG.L., JT. H. and P.M. performed clinical data analysis.  
723 B. L. and JF. Y. conducted the library preparation and sequencing of single cell RNA-Seq. YG.W.  
724 and C.A. performed bioinformatic analysis for bulk RNA-Seq and YG.W. performed analysis for  
725 single RNA-Seq.  
726 T.W. and P.M. oversaw the bioinformatic analysis.  
727 D.J.V. performed the SOX2-ChIP-Seq and analysis.  
728 ZQ. X. conducted the deposit of bioinformatic data.  
729 P.M. are the corresponding authors of this manuscript.

730

731 **Competing interests:** Authors declare that they have no competing interests.

732

733 **Data and materials availability:** Further information and requests for resources and reagents  
734 should be directed to and will be fulfilled by the Lead Contact, Dr. Ping Mu  
735 (ping.mu@utsouthwestern.edu). All cell lines, plasmids and other reagents generated in this study  
736 are available from the Lead Contact with a completed Materials Transfer Agreement if there is  
737 potential for commercial application. All the described bulk RNA-seq data and single cell RNA-  
738 seq data have been deposited in the Gene Expression Omnibus under the accession numbers  
739 GSE175975.

## 740 **Supplementary Materials**

741 Materials and Methods

742 Figs. S1 to S10

743 Tables S1 to S2

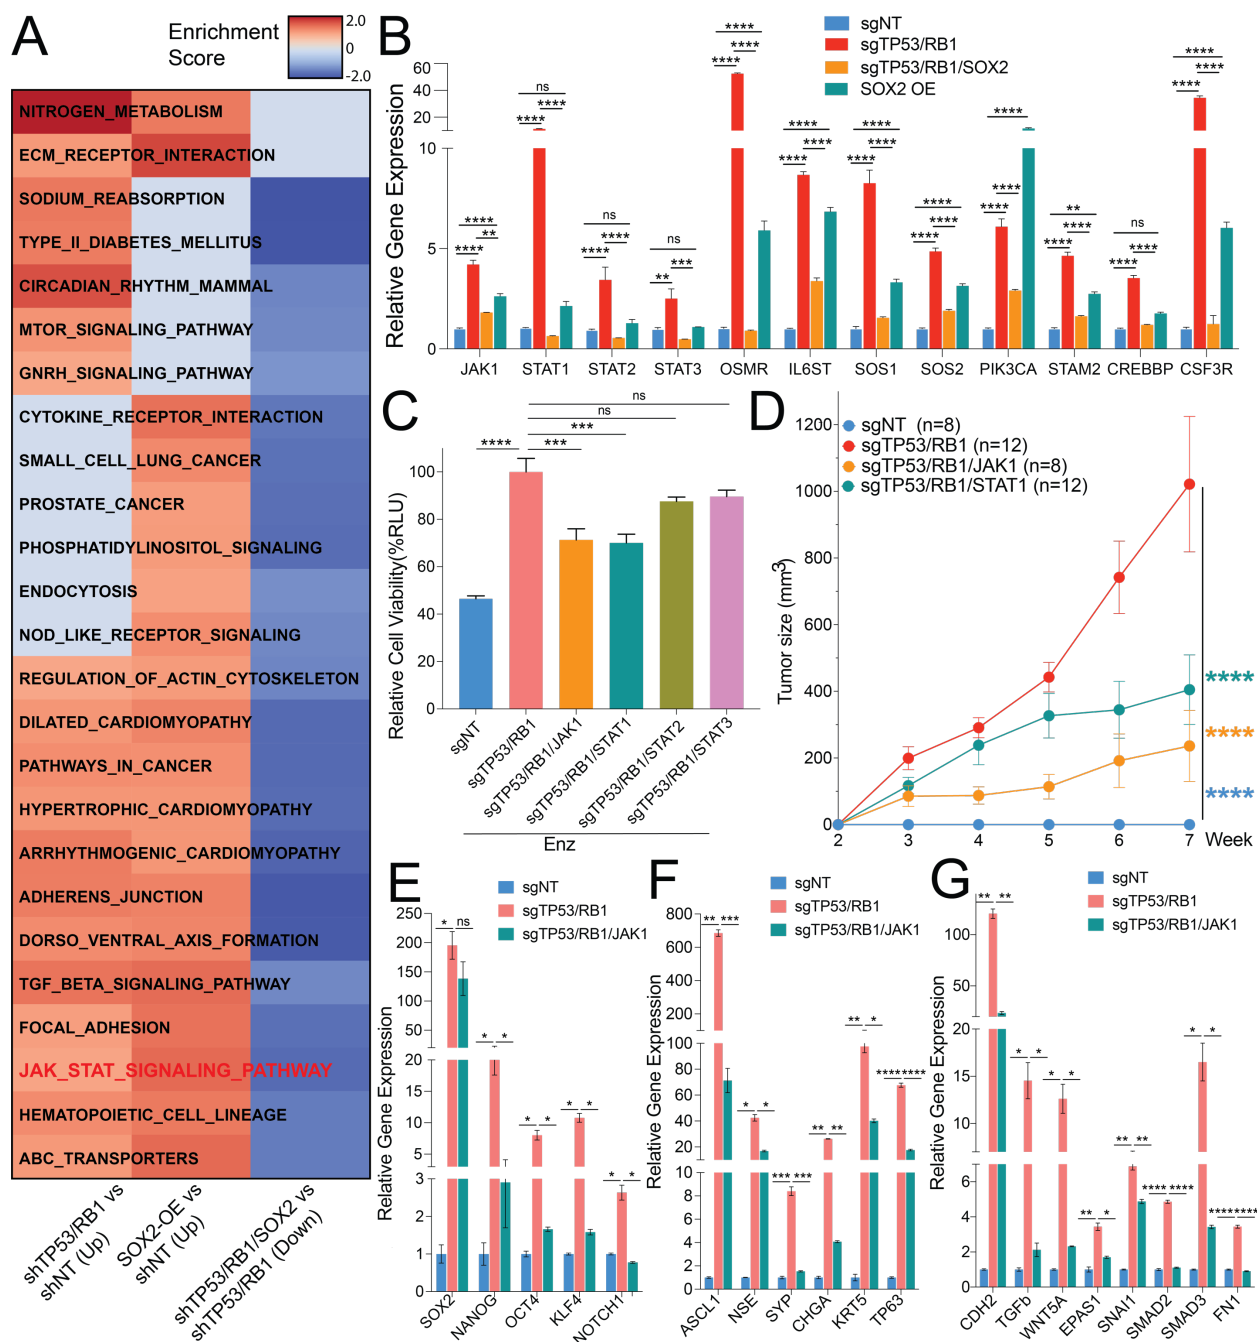

744  
745 **Fig. 1: JAK-STAT signaling is required for lineage plasticity and enzalutamide resistance in**  
746 **TP53/RB1-deficient mCRPC.** (A) Heatmap represents the significantly changed signaling  
747 pathways in LNCaP/AR cell lines transduced with annotated shRNAs based on GSEA analysis.  
748 Three comparisons are presented. Reads from 3 biological replicates in each group were used for  
749 analysis. (B) Relative gene expression of canonical genes being activated in the JAK-STAT  
750 signaling pathway in LNCaP/AR cells transduced with annotated guide RNAs. (C) Relative cell  
751 number of LNCaP/AR cells transduced with annotated CRISPR guide RNAs. Cells were treated  
752 with 10  $\mu$ M enzalutamide (Enz) for 8 days and cell numbers (viability) were measured using  
753 CellTiter-Glo assay, all normalized to sgTP53/RB1 group. p values were calculated using one-way  
754 ANOVA. (D) Tumor growth curve of xenografted LNCaP/AR cells transduced with annotated

755 guide RNAs in castrated mice. Enz denotes enzalutamide treatment at 10 mg/kg from day 1 of  
756 grafting. Veh denotes 0.5% CMC+0.1% Tween 80. p values were calculated using two-way  
757 ANOVA. (E) Relative expression of canonical stem cell-like lineage marker genes in LNCaP/AR  
758 cells transduced with annotated guide RNAs. (F) Relative expression of canonical basal and NE  
759 cell-like lineage marker genes in LNCaP/AR cells transduced with annotated guide RNAs. (G)  
760 Relative expression of canonical EMT lineage marker genes in LNCaP/AR mCRPC cells  
761 transduced with annotated guide RNAs. For all panels unless otherwise noted, mean  $\pm$  s.e.m. is  
762 represented and p values were calculated using two-way ANOVA. \*\*\*\* p<0.0001. \*\*\* p<0.001.  
763 \*\* p<0.01. \* p<0.05. See also **fig.S1-7** and **table S1**.

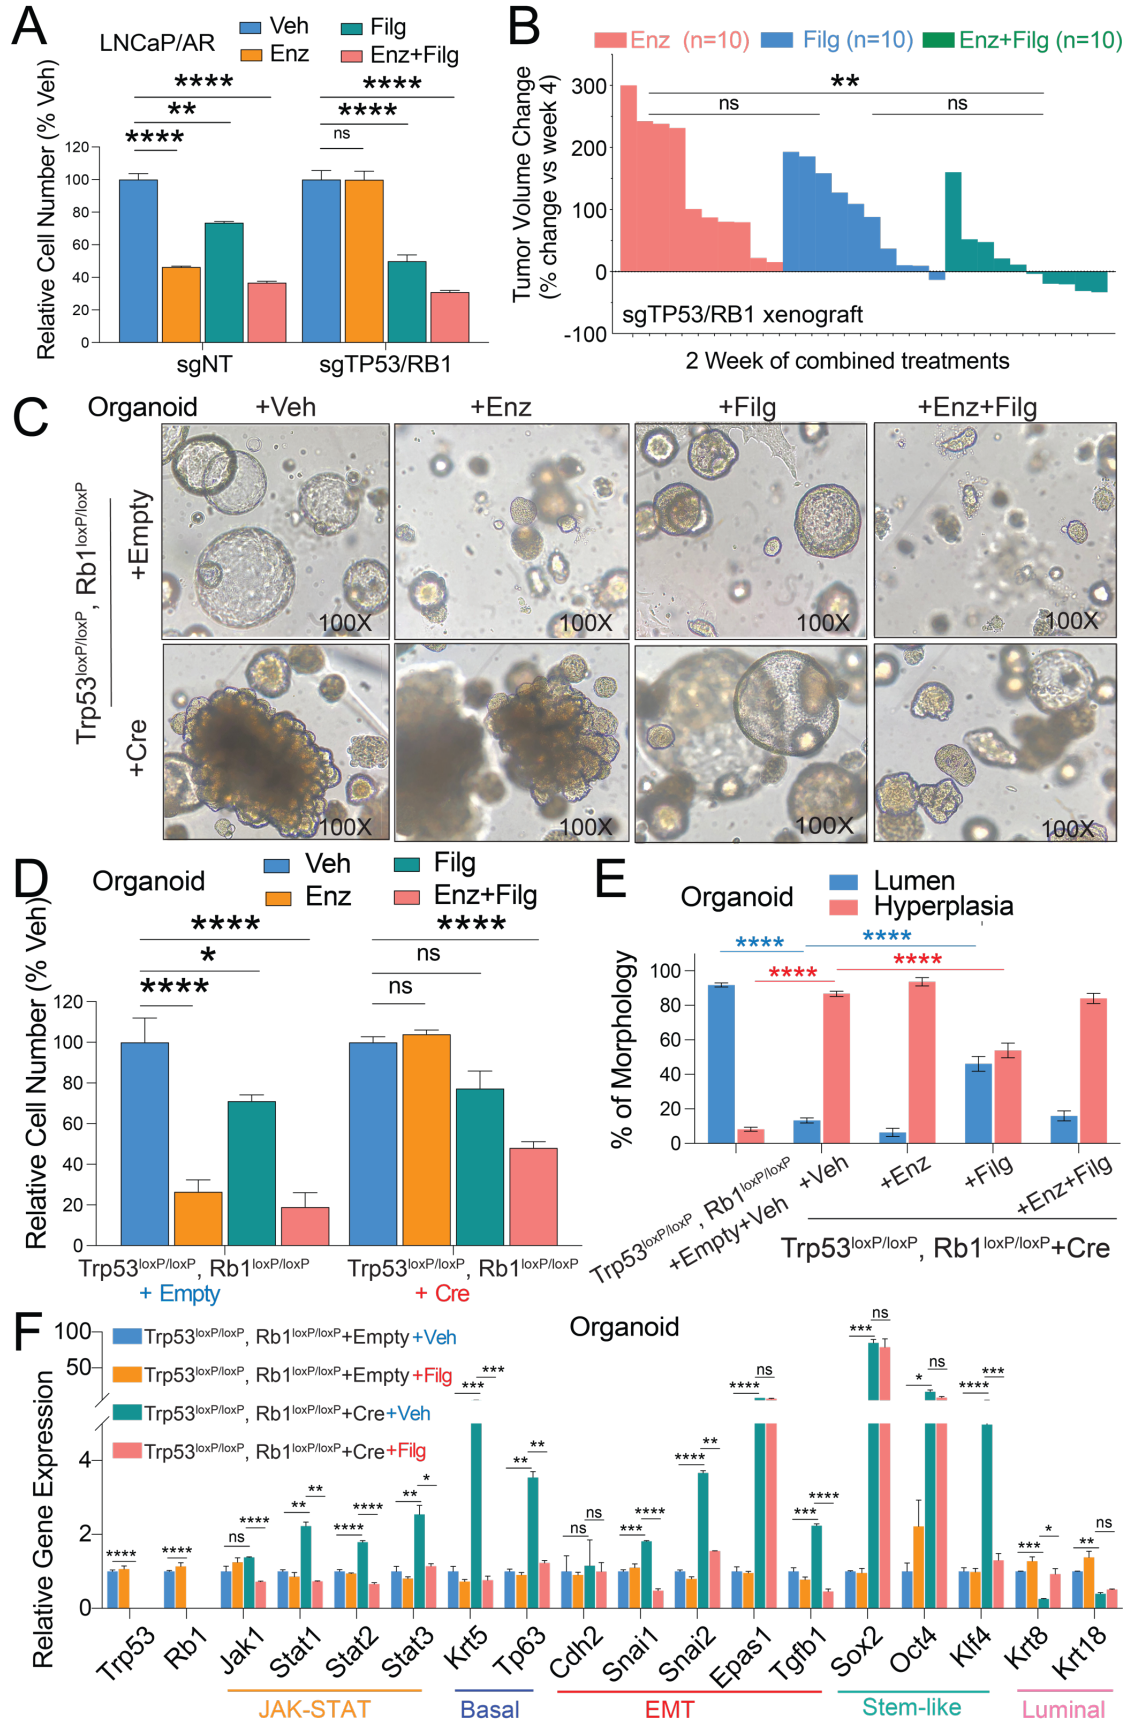

765 **Fig. 2: JAK1 inhibitor restores enzalutamide sensitivity in human mCRPC cells and 3D-**  
766 **cultured organoids. (A)** Relative cell number of LNCaP/AR cells transduced with annotated  
767 CRISPR guide RNAs and treated with annotated treatments, normalized to “Veh” group. Enz  
768 denotes 10 $\mu$ M enzalutamide, Filg denotes 5 $\mu$ M filgotinib, Enz+Filg denotes the combination of  
769 enzalutamide and filgotinib, Veh denotes DMSO treatment with same volume as enzalutamide,  
770 for 8 days and cell number were measured by CellTiterGlo assay. **(B)** Waterfall plot displaying  
771 changes in tumor size of xenografted LNCaP/AR-sgTP53/RB1 cells after 2 weeks of treatments.  
772 All animals were treated with enzalutamide at 10 mg/kg orally 1 day after grafting. Beginning  
773 from week 3 of xenografting, animals were randomized into 3 groups and treated with  
774 enzalutamide only at 10 mg/kg orally, filgotinib only at 20 mg/kg orally twice daily or the  
775 combination of enzalutamide plus filgotinib. mean  $\pm$  s.e.m. is represented, and p values were  
776 calculated using one-way ANOVA. **(C)** Bright field pictures of murine organoids transduced with  
777 Cre or empty vector. Organoid were cultured in 3D matrigel and treated with DMSO (Veh), 1 $\mu$ M  
778 enzalutamide (Enz), 5 $\mu$ M filgotinib (Filg) or the combination of enzalutamide and filgotinib  
779 (Enz+Filg) for 6 days. **(D)** Relative cell number of murine organoids transduced with Cre or empty  
780 vectors and treated with annotated treatments for 6 days, normalized to “Veh” group. Treatment’s  
781 denotation is same as panel C. mean  $\pm$  s.e.m. is represented, and p values were calculated using  
782 two-way ANOVA. **(E)** Percentage of murine organoids display typical lumen or hyperplasia  
783 morphology. 3 representative images for each of the lines were counted. Trp53<sup>loxP/loxP</sup>, Rb1<sup>loxP/loxP</sup>.  
784 Empty organoids treated with Enz and/or Filg didn’t form typical and large organoid morphology,  
785 thus percentage not shown. Treatment’s denotation is same as panel E. mean  $\pm$  s.e.m. is  
786 represented, and p values were calculated using two-way ANOVA. **(F)** Relative expression of  
787 canonical JAK-STAT and lineage marker genes in 3D-cultured organoids treated with DMSO or  
788 Filgotinib. Filg denotes 5 $\mu$ M filgotinib and Veh denotes DMSO treatment with same volume. p  
789 values were calculated using two-way ANOVA. For all panels, \*\*\*\* p<0.0001. \*\*\* p<0.001. \*\*  
790 p<0.01. \* p<0.05. See also **fig.S8**.

791

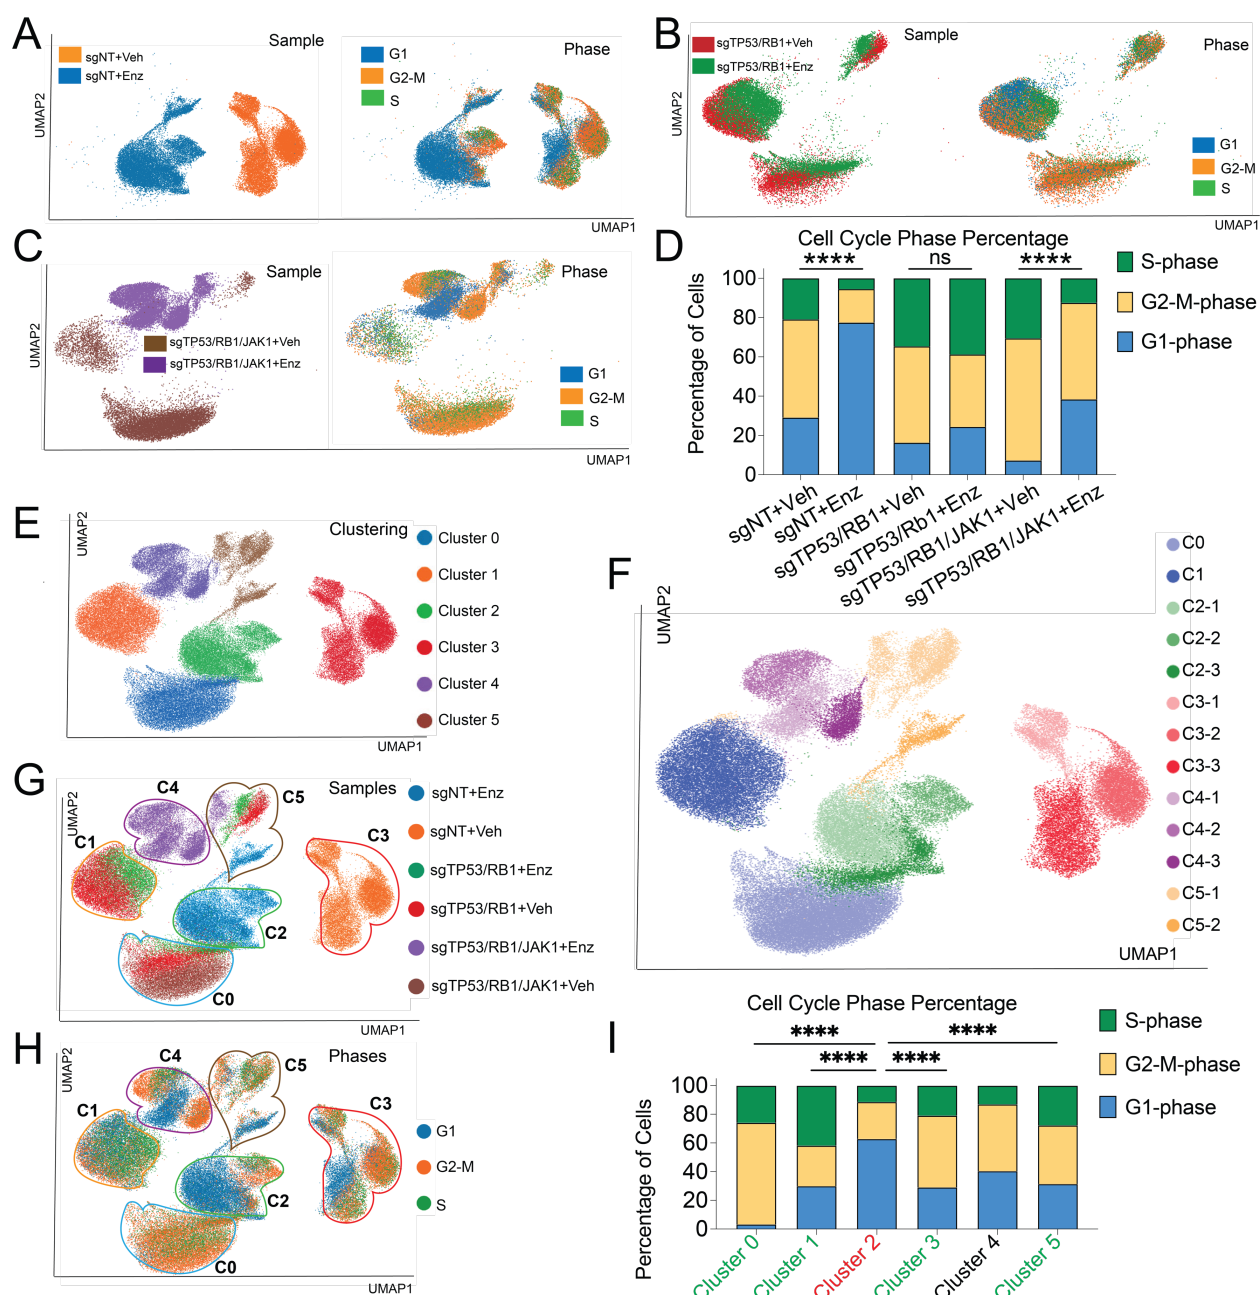

792

793

794

795

796

797

798

799

800

801

802

**Fig. 3. JAK-STAT is required for the survival of resistant subclones of cells in TP53/RB1-deficient mCRPC.** (A-C) UMAP plots of single cell transcriptomic profiles of LNCaP/AR cells transduced by annotated CRISPR guide RNAs, treated with vehicle (DMSO) or 10 $\mu$ M enzalutamide for 5 days. a, LNCaP/AR-sgNT (Veh n=14268, Enz n=15149), (B) LNCaP/AR-sgTP53/RB1 (Veh n=12267, Enz n=9850), and (C) LNCaP/AR-sgTP53/RB1/JAK1 (Veh n=25200, Enz n=11096). The left panels were colored according to sample origin while cells in the right panels were colored by predicted cell cycle phase. (D) Bar plot presents the percentage distribution of each single cells in different cell cycle phases in each sample. p-values are calculated with Fisher's Exact Test. \*\*\* p<0.001. (E) Single-cell profile of LNCaP/AR cells based on clustering. UMAP plot of single cells colored by unsupervised clustering of 6 subsets is presented. (F) Single-

803 cell profile of LNCaP/AR cells based on sub-clustering. UMAP plot of single cells colored by  
804 unsupervised clustering of 13 sub-clusters is presented. (G) Single-cell profile of LNCaP/AR cells  
805 transduced with annotated CRISPR guide RNAs and treated with vehicle or enzalutamide. UMAP  
806 plot of single cells colored by samples is represented. Area and number of clusters in panel E is  
807 highlighted with color circles. (H) Single-cell profile of LNCaP/AR cells based on cell cycle states.  
808 UMAP plot of single cells colored by cell cycle prediction is presented. Area and number of  
809 clusters in panel E is highlighted with color circles. (I) Bar plot presents the percentage distribution  
810 of each single cells in different cell cycle phases in each of the 6 clusters. p-values are calculated  
811 with Fisher's Exact Test. For all panels, \*\*\*\* p<0.0001, \*\*\* p<0.001, \*\* p<0.01, \* p<0.05. ns: not  
812 significant. See also **fig.S9** and **table S2**.

813

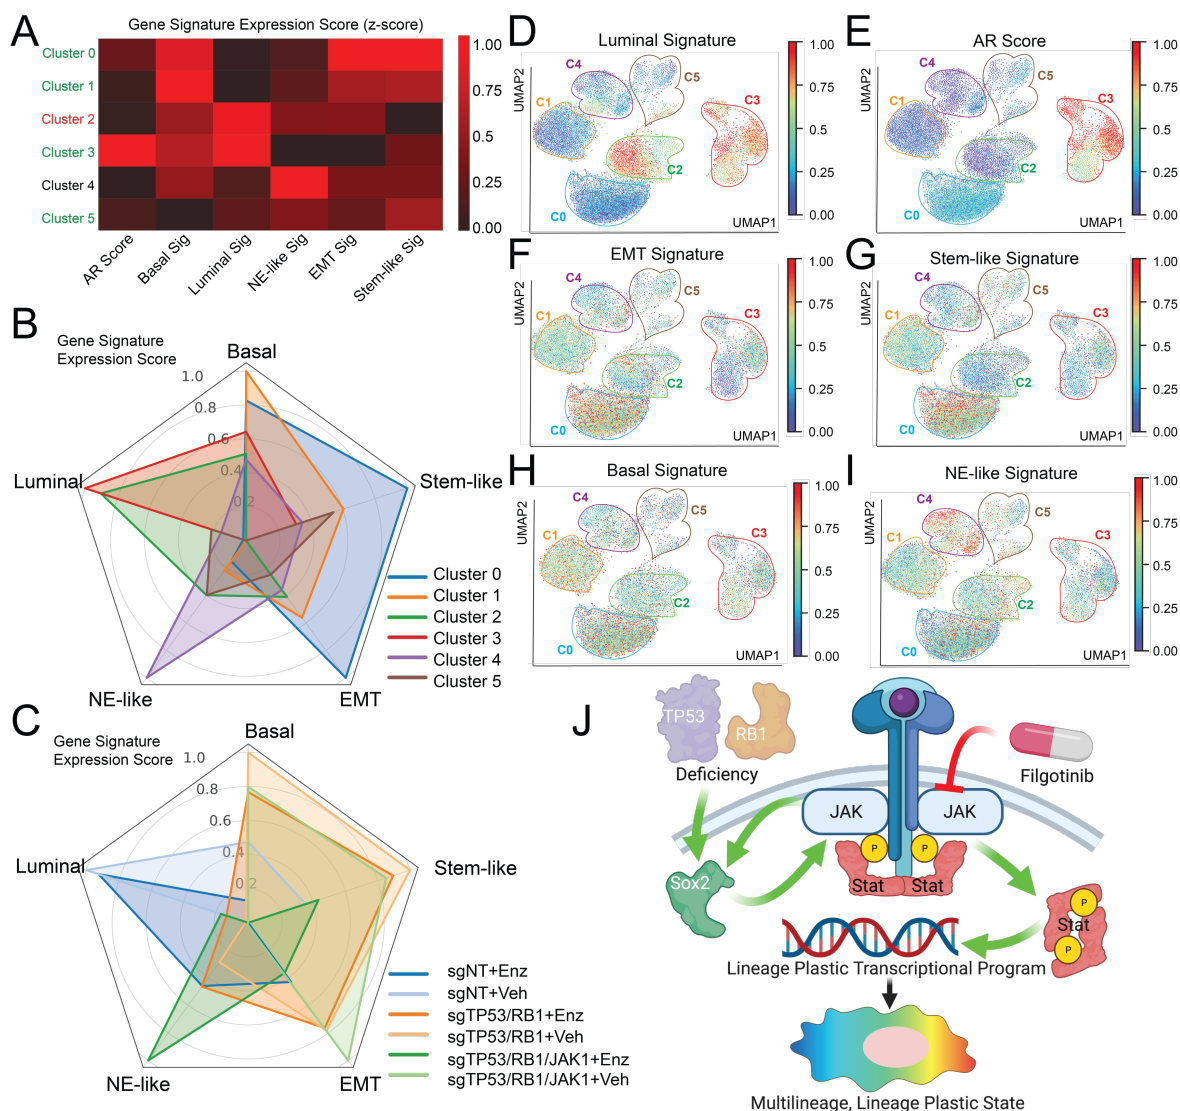

814  
 815 **Fig. 4: JAK-STAT signaling is required for the maintenance of lineage plastic subsets of**  
 816 **mCRPC cells.** (A) Heatmap represents the lineage scores of canonical lineage marker gene  
 817 gene signatures in cell clusters. Winner clusters (without increased cell cycle arrest) is highlighted in  
 818 green and loser clusters (with increased cell cycle arrest) is highlighted in red. (B) Radar plot  
 819 represents the lineage scores and distribution of different cell clusters. (C) Radar plot represents  
 820 the lineage scores and distribution of different samples. For panel A-C, lineage scores were scaled  
 821 to 0-1 across all clusters. (D) UMAP plot of single cell transcriptomic profiles colored by luminal  
 822 gene signature score (z-score) for each cell (dot). (E) UMAP plot of single cell transcriptomic  
 823 profiles colored by AR gene signature score (z-score) for each cell (dot) of LNCaP/AR cells  
 824 transduced with annotated CRISPR guide RNAs and treated with vehicle or enzalutamide. (F)  
 825 UMAP plot of single cell transcriptomic profiles colored by EMT gene signature score (z-score)  
 826 for each cell (dot). (G) UMAP plot of single cell transcriptomic profiles colored by Stem cell-like  
 827 gene signature score (z-score) for each cell (dot). (H) UMAP plot of single cell transcriptomic



828 profiles colored by basal gene signature score (z-score) for each cell (dot). **(I)** UMAP plot of single  
829 cell transcriptomic profiles colored by NE-like gene signature score (z-score) for each cell (dot).  
830 For panel **A-F**, distribution area of each LNCaP/AR cell line sample numbers are labeled with  
831 black and each of the Clusters are labeled in color circles. Color density of each cell is scaled by  
832 the color bar. For all panels, lineage scores were scaled to 0-1 across all cells. **(J)** Schematic  
833 describing that JAK-STAT transcriptionally upregulated in the mCRPC cells with TP53/RB1  
834 deficiency and ectopic SOX2 activity, created with BioRender.com. See also **fig. S9-10** and **table**  
835 **S2**.

836  
837  
838  
839  
840  
841  
842  
843  
844  
845  
846  
847  
848  
849  
850  
851  
852  
853

Supplementary Materials for

**JAK-STAT Signaling Enables Lineage Plasticity-driven AR Targeted Therapy Resistance**

**Authors:** Su Deng<sup>1,†</sup>, Choushi Wang<sup>1,†</sup>, Yunguan Wang<sup>2,†</sup>, Yaru Xu<sup>1</sup>, Xiaoling Li<sup>1</sup>, Nickolas A Johnson<sup>1</sup>, U-Ging Lo<sup>3</sup>, Lingfan Xu<sup>4</sup>, Julisa Gonzalez<sup>1</sup>, Lauren A Metang<sup>1</sup>, Jianfeng Ye<sup>5</sup>, Carla Rodriguez Tirado<sup>1</sup>, Kathia Rodarte<sup>6</sup>, Zhiqun Xie<sup>2</sup>, Carlos Arana<sup>7</sup>, Valli Annamalai<sup>1</sup>, Jer-Tsong Hsieh<sup>4</sup>, Donald J. Vander Griend<sup>8</sup>, Bo Li<sup>5</sup>, Tao Wang<sup>2</sup>, Ping Mu<sup>1,9,10,\*</sup>

correspondence to: [ping.mu@utsouthwestern.edu](mailto:ping.mu@utsouthwestern.edu) (P.M.)

**This PDF file includes:**

Materials and Methods  
Figs. S1 to S10  
Table. S1 to S2

## 854 **Materials and Methods**

### 855 Human cell line and mouse organoid culture:

856 LNCaP/AR and CWR22Pc prostate cancer cell lines were generated and maintained as previously  
857 described(7, 10, 63, 64). LNCaP/AR and CWR22Pc cells were cultured in RPMI 1640 medium  
858 supplemented with 10% fetal bovine serum (FBS), 1% L-glutamine, 1% penicillin-streptomycin,  
859 1% HEPES, and 1% sodium pyruvate (denoted as normal culture medium). LNCaP/AR cells were  
860 passaged every 3-5 days at a 1:6 ratio, CWR22Pc cells were passaged every 3-5 days at 1:3 ratio.  
861 When treated with 10  $\mu$ M enzalutamide and/or 5  $\mu$ M filgotinib, LNCaP/AR cells were cultured in  
862 RPMI 1640 medium supplemented with 10% charcoal-stripped serum (denoted as CSS medium).  
863 All cell cultures were assessed for mycoplasma monthly via the highly sensitive MycoAlert<sup>TM</sup>  
864 PLUS Mycoplasma Detection kit from Lonza (Cat #LT07-710). Cell line identification was  
865 validated each year through the human STR profiling cell authentication provided by the UT  
866 Southwestern genomic sequencing core and compared to ATCC cell line profiles. Trp53<sup>loxP/loxP</sup>,  
867 Rb1<sup>loxP/loxP</sup> murine organoids were generated from Trp53<sup>loxP/loxP</sup>, Rb1<sup>loxP/loxP</sup> mice as previously  
868 described(10). The organoids are cultured in 3D Matrigel according to established protocol (65,  
869 66). The organoids are split at 1:3 ratio every 6 days by trypsin or sterile glass pipette. Organoids  
870 were transduced with lentivirus constructs of either Cre or DsRed (empty) as control and selected  
871 with 1  $\mu$ g/ml puromycin for 5 days, 2 days post transduction as previously described(10). When  
872 treated with 1 $\mu$ M enzalutamide and/or 5 $\mu$ M filgotinib, these organoids were cultured in typical  
873 murine organoid medium supplemented with drugs (65, 66)

874

### 875 CRISPR model generation:

876 Lentiviral transduction of cells for guide RNA experiments was performed as previously described  
877 with some modifications(7, 10, 67). Lentiviral virus was used for CRISPR-based knockout of  
878 TP53, RB1, and all the other genes modified in the manuscript. CRISPR-mediated gene  
879 modification was performed as previously described(7). Specifically, LNCaP/AR cells were  
880 seeded at 400,000 cells per well in 2 ml of media in 6-well plates. The next day, media was replaced  
881 with media containing 50% of virus and 50% of fresh culture medium, along with 5  $\mu$ g/ml  
882 polybrene. The lentiviral virus containing media was removed after 24 hours and replaced with  
883 normal culture medium. Three days post transduction, the cells were selected with 2  $\mu$ g/ml  
884 puromycin for 4 days or 5  $\mu$ g/ml blasticidin for 5 days. For cells with double colors, transduced  
885 cells were further sorted by Flow Cytometer for double positive population. All shRNAs and  
886 related constructs have been previously described(7, 10, 67). Human DYKDDDDK (Flag)-tagged-  
887 SOX2 expression lentivirus (cat #337402) was purchased from Qiagen and used for direct cell  
888 transduction, following the manufacturer's instruction. The All-In-One lentiCRISPR v2 (Addgene  
889 Plasmid #52961), LentiCRISPRv2GFP (Addgene Plasmid #82416), LentiCRISPRv2-mCherry  
890 (Addgene Plasmid #99154), pLKO5.sgRNA.EFS.RFP (Addgene Plasmid #57823),  
891 pLKO5.sgRNA.EFS.GFP, lentiCas9-Blast (Addgene Plasmid #52962) plasmids were used to  
892 generate the CRISPR and guide RNAs targeting TP53, RB1, JAK1, and all the other genes  
893 modified in the manuscript. The guide RNA constructs with empty space holder served as the  
894 sgNT control. The guide RNAs were designed using the online CRISPR designing tool at  
895 Benchling (<https://benchling.com>). The sequences of sgRNAs are listed below:

896 sgRB1-F: CACCGATAGGCTAGCCGATACACTG  
897 sgRB1-R: AAACCAGTGTATCGGCTAGCCTATC  
898 sgTP53-F: CACCGCCATTGTTCAATATCGTCCG  
899 sgTP53-R: AAACCGGACGATATTGAACAATGGC

900 sgJAK1-F: CACCGATCTTCTATCTGTCTGGACA  
901 sgJAK1-R: AAAGTGTCCGACAGATAGAAGATC  
902 sgSTAT1-F: CACCGTTATGATGACAGTTTTCCCA  
903 sgSTAT1-R: AAAGTGGGAAAAGTGCATCATAAC  
904 sgSTAT2-F: CACCGGTGCAGCTGATCCTGAAAG  
905 sgSTAT2-R: AAACCTTTCAGGATCAGCTGCACC  
906 sgSTAT3-F: CACCGACAGCTTCCCAATGGAGCTG  
907 sgSTAT3-R: AAACCAGCTCCATTGGGAAGCTGTC

908

909 *in vivo* xenografts experiment:

910 All animal experiments were performed in compliance with the guidelines of the Animal Resource  
911 Center of UT Southwestern, similarly as previously described (7). LNCaP/AR *in vivo* xenograft  
912 experiments were conducted by subcutaneous injection of  $2 \times 10^6$  cells (100  $\mu$ l in 50% Matrigel  
913 and 50% growth media) into the flanks of castrated male SCID mice on both sides. For experiment  
914 in Fig.1D, daily gavage treatment with 10 mg/kg enzalutamide or vehicle (1% carboxymethyl  
915 cellulose, 0.1% Tween 80, 5% DMSO) was initiated one day after the injection. Once tumors were  
916 noticeable, tumor size was measured weekly by digital caliper. For experiments in Fig 2B, 10  
917 mg/kg enzalutamide (daily) and/or 20 mg/kg filgotinib (twice daily) were given after 3 weeks of  
918 enzalutamide alone administration, when tumors averaged around 200 mm<sup>3</sup> in size. Enzalutamide  
919 was purchased from the Organic Synthesis Core Facility at MSKCC. Filgotinib is commercially  
920 available from MedChem Express.

921

922 Cell Dose Response Curve, Growth, Viability, and FACS-based Competition Assays

923 Cell growth assay, viability assay, dose response curve and competition assay were conducted as  
924 previously described (7). Specifically, for viability assay and dose response curve, 4000  
925 LNCaP/AR cells were seeded in 96-well plate and treated with different dosages of treatments for  
926 8 days before performing the assay, then cell viability were measured by CellTiter-Glo  
927 luminescent cell viability assay (Promega cat #7570) according to manufacture protocol. For cell  
928 growth assay, LNCaP/AR (10,000 cells per well) or CWR22Pc (50,000 cells per well) cells were  
929 seeded in a 24-well cell culture plate, in FBS medium (CWR22Pc) or CSS medium (LNCaP/AR)  
930 and treated with enzalutamide (10  $\mu$ M for LNCaP/AR, 1  $\mu$ M for CWR22Pc) or vehicle (DMSO)  
931 for 7 days (LNCaP/AR) or 4 days (CWR22Pc) and cell numbers were counted. Cell growth assays  
932 were conducted in triplicate and mean  $\pm$  S.E.M. were reported. For organoid growth assay, 2000  
933 murine organoid cells were seeded in 3D Matrigel (per 50  $\mu$ l sphere) in murine organoid media  
934 (65, 66) with enzalutamide and/or filgotinib for 6 days. Matrigel was washed away with cell  
935 recovery medium (Corning, cat #354253) and organoids were separated into single cell suspension  
936 by trypsin, then cell numbers were counted, and the relative cell growth (treatments/veh) was  
937 calculated. For FACS-based competition assay, the competition cell mixture of ~20%  
938 sgTP53/RB1-RFP cells and ~80% sgNT-GFP cells was treated with 10  $\mu$ M enzalutamide and the  
939 percentage of RFP positive cells were measured by FACS on day 0, day 4, day 8. Relative cell  
940 number fold change was calculated and normalized to veh treated group as previously described  
941 (7).

942

943 Boyden chamber migration and invasion assays:

944 20,000 LNCaP/AR cells were resuspended in serum free RPMI, seeded in the upper transwell  
945 insert (Corning cat #353097). RPMI with 10% serum was added to the lower chamber as a

946 chemoattractant. After 60 h incubation, cells that migrated to the lower side of the transwell insert  
947 were fixed with PFA, stained with 1% crystal violet. Images were acquired on Leica DMI8 inverted  
948 microscope. 9 representative images of each group were used to quantify the migrated cell numbers  
949 using ImageJ. For invasion assay, the inserts were coated with a layer of extracellular matrix  
950 (ECM) gel, Matrigel (Corning, Cat# 354234), before plating. The stock Matrigel (10 mg/ml) was  
951 thawed overnight at 4 °C and then diluted in cold serum-free RPMI to a working amount of 30 µg  
952 per insert. Each insert was coated with 100 µl of diluted Matrigel and incubated 1 h at 37 °C in a  
953 humidified atmosphere in the presence of 5% CO<sub>2</sub>. Following incubation of the gel layer, cells  
954 were plated at the same density and in the same manner as described in the migration section. After  
955 allowing 60 h for invasion, cells were fixed, stained with 1 % crystal violet, and quantified using  
956 the same method as migration assay as described above.

957

#### 958 Gene expression detection by qPCR, Western Blot

959 qPCR and western blot experiments were conducted as previously described (7, 10, 67).  
960 Specifically, Total RNA from cells was extracted using Trizol (Ambion, Cat 15596018) following  
961 manufacturer's instructions. cDNA was made using the SuperScript™ IV VILO™ Master Mix  
962 with ezDNase™ Enzyme (Thermo Fisher, 11766500) following manufacturer's instructions, with  
963 200 ng/µl RNA template. 2X PowerUp™ SYBR™ Green Master Mix (Thermo Fisher, A25778)  
964 was used in the amplification of the cDNA. Assays were performed in triplicate and normalized  
965 to endogenous β-Actin expression. For western blot, proteins were extracted from whole cell lysate  
966 using RIPA buffer, then measured with Pierce BCA Protein Assay Kit (cat #23225). Protein lysates  
967 were boiled at 95°C for 5 minutes and run on the NuPAGE 4-12% Bis-Tris gels (Invitrogen, Cat  
968 #NP0323). Transfer was conducted at 4°C for 1 hour at 100 volts. Membranes were blocked in  
969 5% non-fat milk for 15 minutes prior to addition of primary antibody and washed with 1X TBST  
970 (10X stock from Teknova, T9511). Antibodies for western blot are listed: JAK1 (Cell Signaling  
971 Technology, Cat # 3332S), STAT1 (Cell Signaling Technology, Cat #9172S), STAT2 (Cell  
972 Signaling Technology, Cat # 93130T), STAT3 (Cell Signaling Technology, Cat # 9139T), p-  
973 STAT1 (Cell Signaling Technology, Cat # 9167S), Rb (Cell Signaling Technology, Cat # #5230),  
974 P53 (Leica Biosystems, Cat# NCL-p53-DO1), Actin (Cell Signaling Technology, cat #4970).

975 Human qPCR primers for gene expression detection are listed:

976 JAK1 (F-GAGACAGGTCTCCCACAAACAC; R-GTGGTAAGGACATCGCTTTTCCG)  
977 JAK2 (F-CCAGATGGAACTGTTCGCTCAG; R-GAGGTTGGTACATCAGAAACACC)  
978 STAT1 (F-ATGGCAGTCTGGCGGCTGAATT; R- CCAAACCAGGCTGGCACAATTG)  
979 STAT2 (F-CAGGTCACAGAGTTGCTACAGC; R-CGGTGAAGTGTGCTGCCAGTCTT)  
980 STAT3 (F-CTTTGAGACCGAGGTGTATCACC; R-GGTCAGCATGTTGTACCACAGG)  
981 OSMR (F-CAGGTGTTCTACCAAATCTGCG; R-AATCCACCCTCTGTGCCTGCAA)  
982 IL6ST (F-CACCCTGTATCACAGACTGGCA; R-TTCAGGGCTTCCTGGTCCATCA)  
983 SOS1 (F-GGAGATCAACCCTTGAGTGCAG; R-TGCTCTACCCAGTGCCGACATA)  
984 SOS2 (F-GGCATATCAGCAAACCAGGACAG; R-CACTCCCTACAAGTTCAGACGG)  
985 PIK3CA (F-GAAGCACCTGAATAGGCAAGTCG; R-GAGCATCCATGAAATCTGGTTCGC)  
986 STAM2 (F-AGGTTGCACGGAAAGTGAGAGC; R-CCTCTGTGATTTTCTCCTTTCCAC)  
987 CREBBP (F-AGTAACGGCACAGCCTCTCAGT; R-CCTGTCGATACAGTGCTTCTAGG)  
988 CSF3R (F-CCACTACACCATCTTCTGGACC; R-GGTGGATGTGATACAGACTGGC)  
989 SOX2-Qiagen RT2 #PPH02471A  
990 NANOG (F- TGGGATTTACAGGCGTGAGCCAC; R-  
991 AAGCAAAGCCTCCCAATCCCAAAC)

992 OCT4 (F- GGGCTCTCCCATGCATTCAAAC; R- CACCTTCCCTCCAACCAGTTGC)  
993 KLF4 (F- CGAACCCACACAGGTGAGAA; R- TACGGTAGTGCCTGGTCAGTTC)  
994 NOTCH1 (F- CAATGTGGATGCCGCAGTTGTG; R- CAGCACCTTGGCGGTCTCGTA)  
995 ASCL1 (F-CCCAAGCAAGTCAAGCGACA; R- AAGCCGCTGAAGTTGAGCC)  
996 NSE-Qiagen RT2 #PPH02058A  
997 SYP-Qiagen RT2 #PPH00717A  
998 CHGA-Qiagen RT2 #PPH01181A  
999 KRT5-Qiagen RT2 #PPH02625F  
1000 TP63-Qiagen RT2 #PPH01032F  
1001 KRT8-Qiagen RT2 #PPH02214F  
1002 KRT18-Qiagen RT2 #PPH00452F  
1003 CDH2-Qiagen QuantiTect #QT00063196  
1004 TGFb-Sigma-Aldrich #H\_TGFB1\_1  
1005 WNT5A-Qiagen QuantiTect #QT00025109  
1006 EPAS1-Qiagen RT2 #PPH02551C  
1007 SNAI1 (F-TGCCCTCAAGATGCACATCCGA; R-GGGACAGGAGAAGGGCTTCTC)  
1008 SMAD2 (F-GGGTTTTGAAGCCGTCTATCAGC; R-CCAACCACTGTAGAGGTCCATTC)  
1009 SMAD3 (F-TGAGGCTGTCTACCAGTTGACC; R-GTGAGGACCTTGTCAAGCCACT)  
1010 FN1 (F-ACAACACCGAGGTGACTGAGAC; R- GGACACAACGATGCTTCTCTGAG)  
1011 TP53-Qiagen RT2 #PPH00213F  
1012 RB1-Qiagen RT2 #PPH00228F  
1013 Mouse qPCR primers for gene expression detection are listed:  
1014 Jak1 (F-CTGTCTACTCCATGAGCCAGCT; R- CCTCATCCTTGTAGTCCAGCAG)  
1015 Stat3 (F-AGGAGTCTAACAAACGGCAGCCT; R- GTGGTACACCTCAGTCTCGAAG)  
1016 Tp53 (F-TGAAGGCCCAAGTGAAGCCCTC; R- TGTGGCGCTGACCCACAACCTGC)  
1017 Rb1 (F-CCTTGAACCTGCTTGTCTCTCTC; CTGAGGCTGCTTGTGTCTCTGT)  
1018 Stat1 (F- GCCTCTCATTGTCACCGAAGAAC; R- TGGCTGACGTTGGAGATCACCA)  
1019 Stat2 (F- GAACCAACTCTCCATTGCCTGG; R- CGTAAGAGGAGAAGTGCAGCT)  
1020 Sox2 (F-AACGGCAGCTACAGCATGATGC; R- CGAGCTGGTCATGGAGTTGTAC)  
1021 Krt5 Qiagen RT2 #PPM59967F-200  
1022 Trp63 Qiagen RT2 #PPM03458A-200  
1023 Krt8 Qiagen RT2 #PPM04776F-200  
1024 Krt18 Qiagen RT2 #PPM05184A-200  
1025 OCT4 Qiagen RT2 #PPM68766A-200  
1026 CDH2 Qiagen QuantiTect #QT00148106  
1027 SNAI1 Qiagen QuantiTect #QT00240940  
1028 SNAI2 Qiagen QuantiTect #QT00098273  
1029 EPAS1 (F- GGACAGCAAGACTTTCCTGAGC; R- GGTAGAACTCATAGGCAGAGCG)  
1030 TGFb (F- TGATACGCCTGAGTGGCTGTCT; R- CACAAGAGCAGTGAGCGCTGAA)  
1031 KLF4 (F- GAACGCCTCATCAATGCCTGCA; R- GAATCAGGGCTGCCTTGAAGAG)

1032

### 1033 ChIP-qPCR and SOX2 ChIP-seq

1034 ChIP experiments were performed as previously described (5, 10). Briefly, cultured cells were  
1035 crosslinked with 1% formaldehyde and was quenched with 0.125M glycine. Cells were then rinsed  
1036 with cold 1X PBS twice and lysed in 1% SDS containing buffer supplemented with 1X protease  
1037 and phosphatase inhibitors. Chromatin was sonicated to an average length of 500bp and then

1038 centrifuged at 14,000 rpm to remove the debris. One percent of the supernatant was saved as input,  
1039 and the rest was added with ChIP-grade antibody overnight, then added 20ul of agarose/protein A  
1040 or G beads and incubated for 4 hours. Beads were washed with standard wash buffers (Low-Salt,  
1041 High-Salt, and LiCl) and finally with TE. The immunoprecipitated chromatin were eluted in  
1042 elution buffer and de-crosslinked by NaCl at 65°C overnight. Proteins were then digested by  
1043 proteinase K and DNA was purified with MinElute PCR Purification Kit (Qiagen, Cat #28006)  
1044 and eluted with 10ul water. Antibodies used are Anti-Histone H3 (acetyl K27) antibody-ChIP  
1045 Grade (Abcam, cat# ab4729), Anti-Histone H3 (tri methyl K4) antibody-ChIP Grade(Abcam,cat#  
1046 ab8580), Tri-Methyl-Histone H3 (Lys27) (C36B11) Rabbit mAb (Cell Signaling Technology, cat  
1047 #9733S). ChIP-qPCR primers:

1048 Jak1-1-F: TGCTTCCCTCCCAAATACACCTCA;  
1049 Jak1-1-R: TTCCTGCTTTGCACTTCAGCTCAG (H3K27me3);  
1050 Jak1-2-F: GTGAATGGTCCATCCCCACA;  
1051 Jak1-2-R: TTTCCCAAAGTGGGGCACAA (H3K27ac/ H3K4me3).

1052  
1053 SOX2 ChIP-Seq in the CWR-R1 and WA01 cells were described in Larischa et al., in revision.  
1054 ChIP experiments were conducted using the ChIP Assay Kit per the manufacturer's protocol (EMD  
1055 Millipore; Burlington, MA). A polyclonal goat anti-SOX2 mAb (P48431, R&D Systems;  
1056 Minneapolis, MN) or goat IgG control were used for immunoprecipitation. Eluted ChIP DNA was  
1057 purified using the PCR Purification Kit (Qiagen). ChIP-Seq libraries were generated using the  
1058 KAPA LTP Library Preparation Kit (#KK8230; Kapa Biosystems; Wilmington, MA). Libraries  
1059 were sequenced on a HiSeq 2000 sequencing system (Illumina) in a 50-bp, single-end run.

1060  
1061 Bulk RNA-seq preparation and analysis:  
1062 LNCaP/AR cells transduced with different CRISPR constructs were treated with enzalutamide or  
1063 vehicle for 6 days before the total RNA was extracted using Trizol (Ambion, Cat 15596018) as  
1064 previously described (7, 10). RNA-Seq libraries were prepared using the Illumina TruSeq stranded  
1065 mRNA kit, with 10 cycles of PCR amplification, starting from 500 ng of total RNA, at the  
1066 integrated genomics operation (IGO) Core at MSKCC. Barcoded RNA-Seq were run as paired-  
1067 end read 50 nucleotides in length on the Illumina HiSeq 2500 and Poly-A selection was performed.  
1068 Adapter trimming and quality trimming was performed with trimgalore (v0.5.0), and ribosomal  
1069 RNA was removed using SortMeRNA (v4.1.0). Trimmed and filtered reads were aligned to  
1070 reference (GRCh37) with STAR (vSTAR2.6.1d). FeatureCounts (v1.6.4) was used for gene  
1071 counts, biotype counts, and rRNA estimation. FPKMs for genes and transcripts were generated by  
1072 StringTie (v1.3.5), and RSeQC (v3.0.0) was used for generating RNA quality control metrics.  
1073 Differential gene expression analysis was performed using the R package DEseq2 (v1.6.3). Cutoff  
1074 values of absolute fold change greater than 2 and FDR<0.1 were used to select for differentially  
1075 expressed genes between sample group comparisons. GSEA statistical analysis was carried out  
1076 with the R package fgsea (<https://www.biorxiv.org/content/10.1101/060012v3>).

1077  
1078 Single cell RNA-seq preparation and analysis:  
1079 LNCaP/AR cells transduced with different CRISPR constructs were treated with enzalutamide or  
1080 vehicle for 5 days before the cells were collected. Single-cell RNA-seq were performed by the 10x  
1081 Genomic single cell 5'library platform. Based on FACS analysis, single cells were sorted into 1.5  
1082 ml tubes (Eppendorf) and counted manually under the microscope. The concentration of single  
1083 cell suspensions was adjusted to 900-1100 cells/μl. Cells were loaded between 10,000 and 17,000

1084 cells/chip position using the Chromium Single cell 5' Library, Gel Bead & Multiplex Kit and Chip  
1085 Kit (10x Genomics, V1 barcoding chemistry). Single-cell gene expression libraries were generated  
1086 according to the manufacturer's instructions and single-cell expression sequencing was run on a  
1087 NovaSeq 6000 (Novogene Co., Ltd). All the subsequent steps were performed following the  
1088 standard manufacturer's protocols. 10x scRNA-seq data was preprocessed using the Cell Ranger  
1089 software (5.0.0). We used the "mkfastq", "count" and 'aggr' commands to process the 10x scRNA-  
1090 seq output into one cell by gene expression count matrix, using default parameters. scRNA-seq  
1091 data analysis was performed with the Scanpy (1.6.0) package in Python(68). Genes expressed in  
1092 fewer than 3 cells were removed from further analysis. Cells expressing less than 100 and more  
1093 than 7000 genes were also removed from further analysis. In addition, cells with a high ( $\geq 0.15$ )  
1094 mitochondrial genome transcript ratio were removed. For downstream analysis, we used count per  
1095 million normalization (CPM) to control for library size difference in cells and transformed those  
1096 into  $\log(\text{CPM}+1)$  values. After normalization, we used the 'pp.highly\_variable\_genes' command  
1097 in Scanpy to find highly variable genes across all cells using default parameters except for  
1098 "min\_mean = 0.01". The data were then z-score normalized for each gene across all cells. We then  
1099 used the 'tl.pca (n\_comps=50, use\_highly\_variable=True)', the 'pp.neighbors (n\_pcs=25,  
1100 n\_neighbors=15)' and the 'tl.leiden (resolution = 0.75)' command in Scanpy to partition the single  
1101 cells into 6 distance clusters. Briefly, these processes first identify 50 principal components in the  
1102 data based on the previously found highly variable genes to reduce the dimensions in the original  
1103 data, and then build a nearest neighbor graph based on the top 25 principal components, and finally  
1104 a partition of the graph that maximizes modularity was found with the Leiden algorithm(69). To  
1105 evaluate the activity of lineage specific transcriptional programs in those cells, we utilized a  
1106 custom library of genes based on the well-established gene signatures for AR target genes (AR  
1107 score) and NE, luminal, basal, stem-like and EMT lineages. The AR score gene signature was  
1108 adapted from Hieronymus et al(48), luminal, basal and NE gene signatures were defined by  
1109 combining the signature genes from(10, 11, 46, 47). EMT and stem-like gene signature were  
1110 adapted from the signature genes of Dong et al(47)plus canonical lineage marker genes (table S2).  
1111 The activation score was calculated based on the overall expression of genes in each gene list using  
1112 the 'tl.score\_genes' function of the Scanpy package.

1113

#### 1114 Statistics Methods

1115 All of the statistical details of experiments can be found in figure legends. For comparisons  
1116 between two groups of independent datasets when normality and homoscedasticity are satisfied,  
1117 multiple t tests were performed, p value and standard error of the mean (s.e.m.) were reported. For  
1118 comparing gene expressions between two patients' groups, Mann Whitney U Test (Wilcoxon Rank  
1119 Sum Test) were performed. For comparisons among more than two groups ( $>2$ ), one-way or two-  
1120 way ANOVA were performed, p values and s.e.m. were reported; and p values were adjusted by  
1121 multiple testing corrections when applicable. For dose response curve, p values were calculated  
1122 by non-linear regression with extra sum-of-squares F test. Fisher's Exact test was used to compare  
1123 the frequency of genomic alterations between different patients' group and percentage of cell  
1124 populations. Chi-square test with Yates correction were used to compared the exact cell numbers  
1125 of different clusters of single cell subclones. For all figures, \*\*\*\* represents  $p < 0.0001$ . \*\*\*  
1126 represents  $p < 0.001$ . \*\* represents  $p < 0.01$ . \* represents  $p < 0.05$ .

1127

#### 1128 Data availability

1129 Further information and requests for resources and reagents should be directed to and will be



1130 fulfilled by the Lead Contact, Dr. Ping Mu ([ping.mu@utsouthwestern.edu](mailto:ping.mu@utsouthwestern.edu)). All cell lines, plasmids  
1131 and other reagents generated in this study are available from the Lead Contact with a completed  
1132 Materials Transfer Agreement if there is potential for commercial application. All the described  
1133 bulk RNA-seq data and single cell RNA-seq data have been deposited in the Gene Expression  
1134 Omnibus under the accession numbers GSE175975.

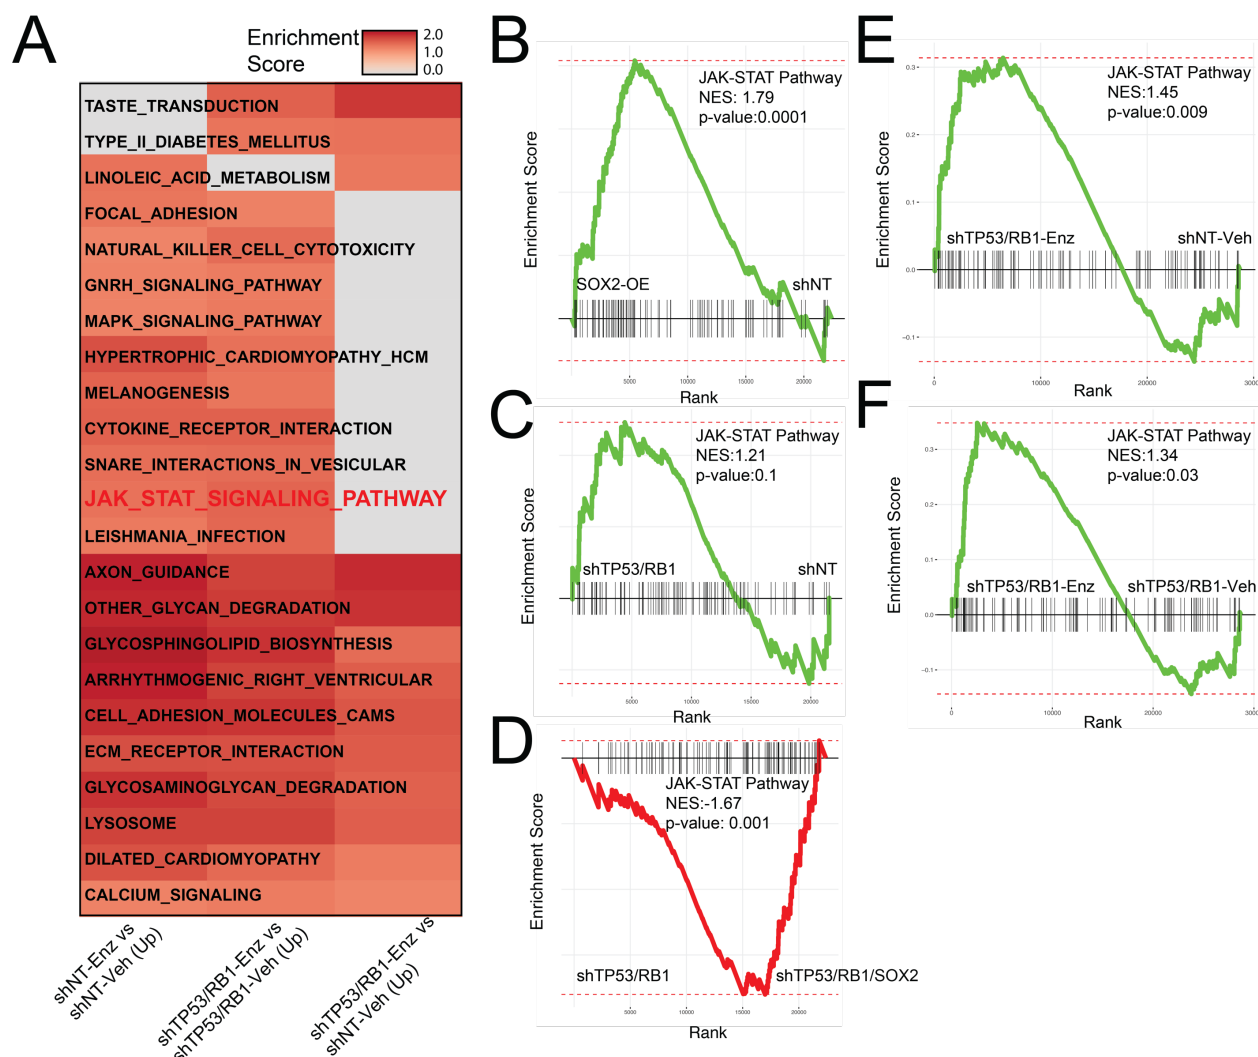

1135  
1136 **Fig.S1: JAK-STAT signaling pathway is enriched in enzalutamide resistant mCRPC with**  
1137 **TP53/RB1-deficiency.** (A) Heatmap represents the significant changed signaling pathways in  
1138 LNCaP/AR cell lines transduced with annotated shRNAs and treated with enzalutamide or vehicle,  
1139 based on GSEA analysis. Three comparisons are presented and reads from 3 biological replicates  
1140 in each group were used for analysis. (B-F) GSEA analysis of JAK-STAT signaling pathway  
1141 (KEGG\_JAK\_STAT\_Signaling\_Pathway) expression in: (B) SOX2-OE group compared to shNT  
1142 group; (C) shTP53/RB1 group compared to shNT group; (D) shTP53/RB1 group compared to  
1143 shTP53/RB1/SOX2 group; (E) shTP53/RB1+Enz group compared to shNT-Veh group; (F)  
1144 shTP53/RB1+Enz group compared to shTP53/RB1+Veh group. Reads from 3 biological replicates  
1145 were used for analysis.

1146

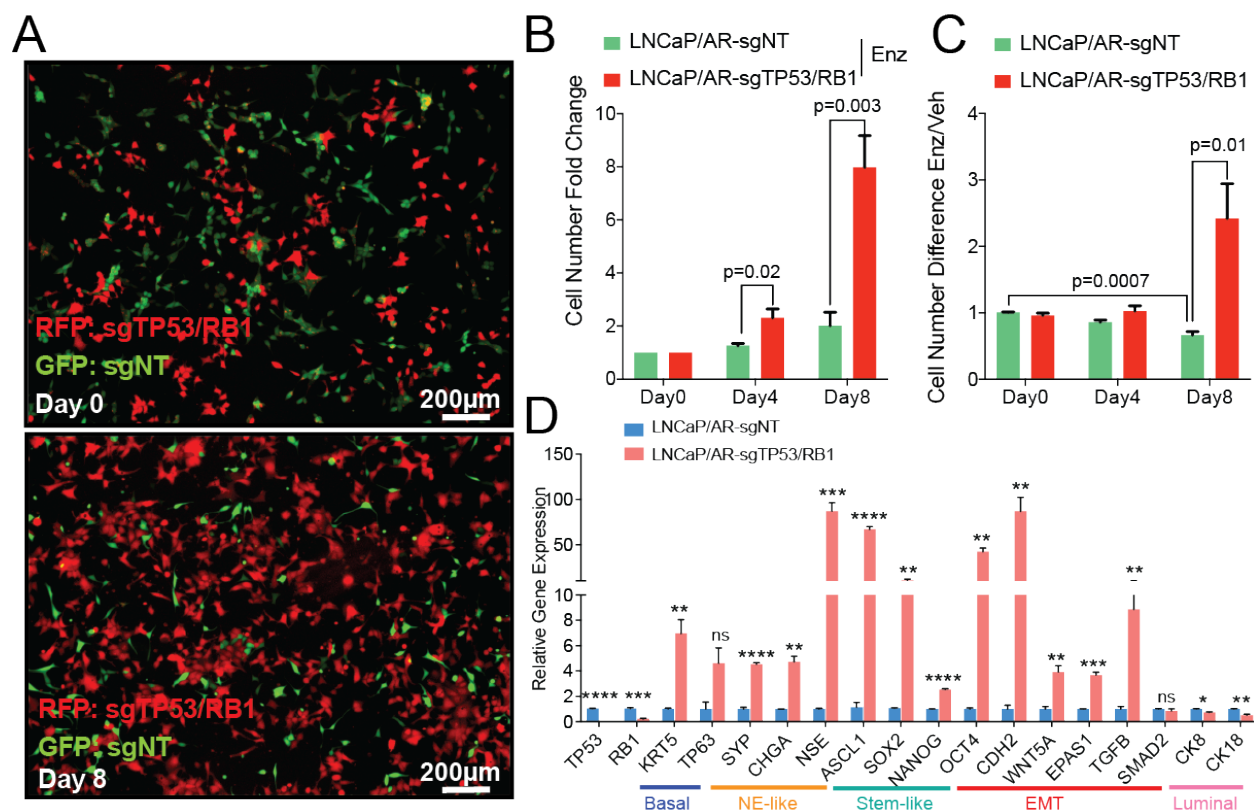

1147  
 1148 **Fig. S2. LNCaP/AR-sgTP53/RB1 is a highly resistant and lineage plastic cell line model. (A)**  
 1149 Fluorescence microscope imaging shows the cell mixtures of sgTP53/RB1-RFP cells (red) and  
 1150 sgNT-GFP cells (green) on Day 0 and Day 8 of the competition assay cultured in CSS medium  
 1151 and 10µM enzalutamide. **(B)** Relative cell number of LNCaP/AR cells transduced with annotated  
 1152 guide RNAs measured in the competition assay. **(C)** Cell number fold change of LNCaP/AR cells  
 1153 transduced with annotated guide RNAs. For **B-C**, cells were treated with 10 µM enzalutamide  
 1154 (Enz) or DMSO (Veh) for 8 days in CSS medium and cell number was measured using FACS. **(D)**  
 1155 Relative expression of canonical lineage marker genes in LNCaP/AR mCRPC cells transduced  
 1156 with annotated guide RNAs. For all panels, mean ± s.e.m. is represented, and p values were  
 1157 calculated using multiple t tests. \*\*\*\* p<0.0001. \*\*\* p<0.001. \*\* p<0.01. \* p<0.05.  
 1158

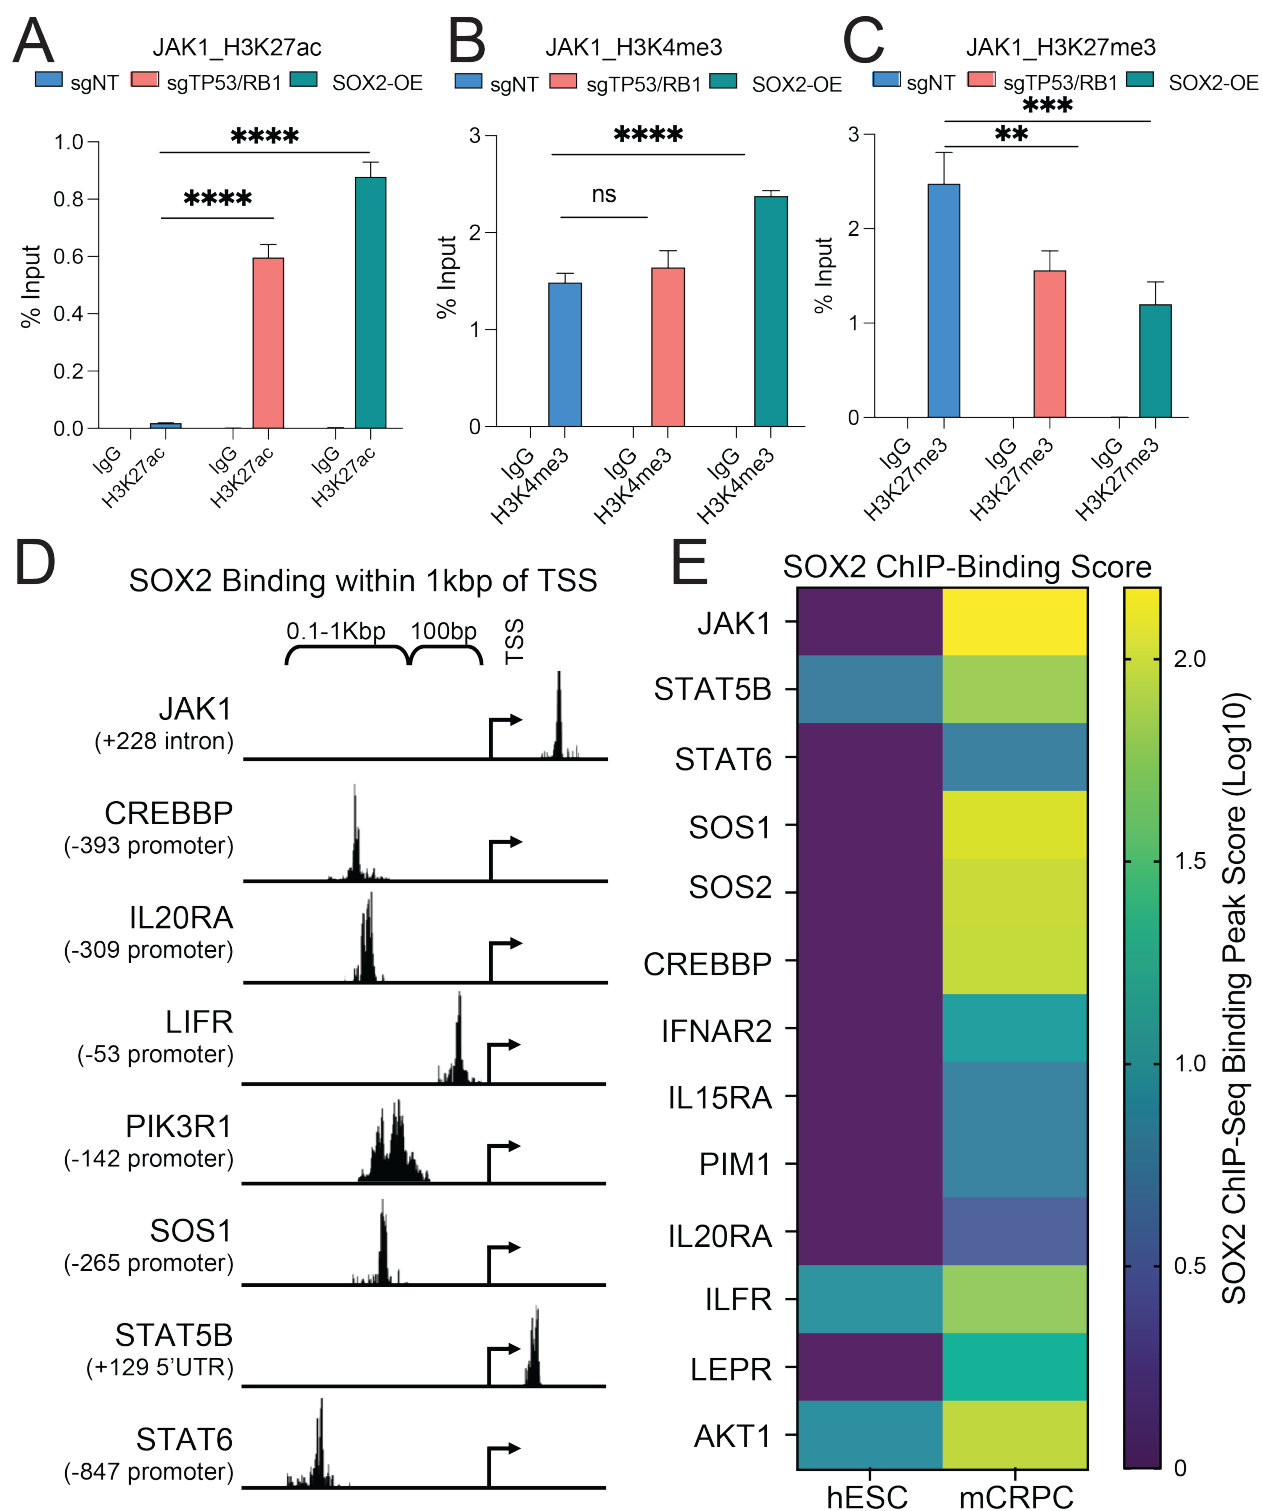

1159  
 1160  
 1161  
 1162  
 1163  
 1164

**Fig. S3. TP53/RB1-deficiency and Sox2 overexpression promotes the transcriptional activation of JAK1.** (A) H3K27ac ChIP-qPCR of the *JAK1* genomic locus in LNCaP/AR cells transduced with annotated constructs. (B) H3K4me3 ChIP-qPCR of the *JAK1* genomic locus in LNCaP/AR cells transduced with annotated constructs. (C) H3K27me3 ChIP-qPCR of the *JAK1* genomic locus in LNCaP/AR cells transduced with annotated constructs. For all panels unless

1165 otherwise noted, mean  $\pm$  s.e.m. is represented and p values were calculated using one-way  
1166 ANOVA. **(D)** Representative SOX2 binding sites in the genomic loci of JAK-STAT signaling  
1167 genes in the mCRPC CWR-R1 cell line based on ChIP-seq analysis. **(E)** SOX2 binding peak score  
1168 in the genomic loci of JAK-STAT signaling genes in the mCRPC CWR-R1 cell (prostate cancer  
1169 specific binding) compared to human ESC cell line WA01.

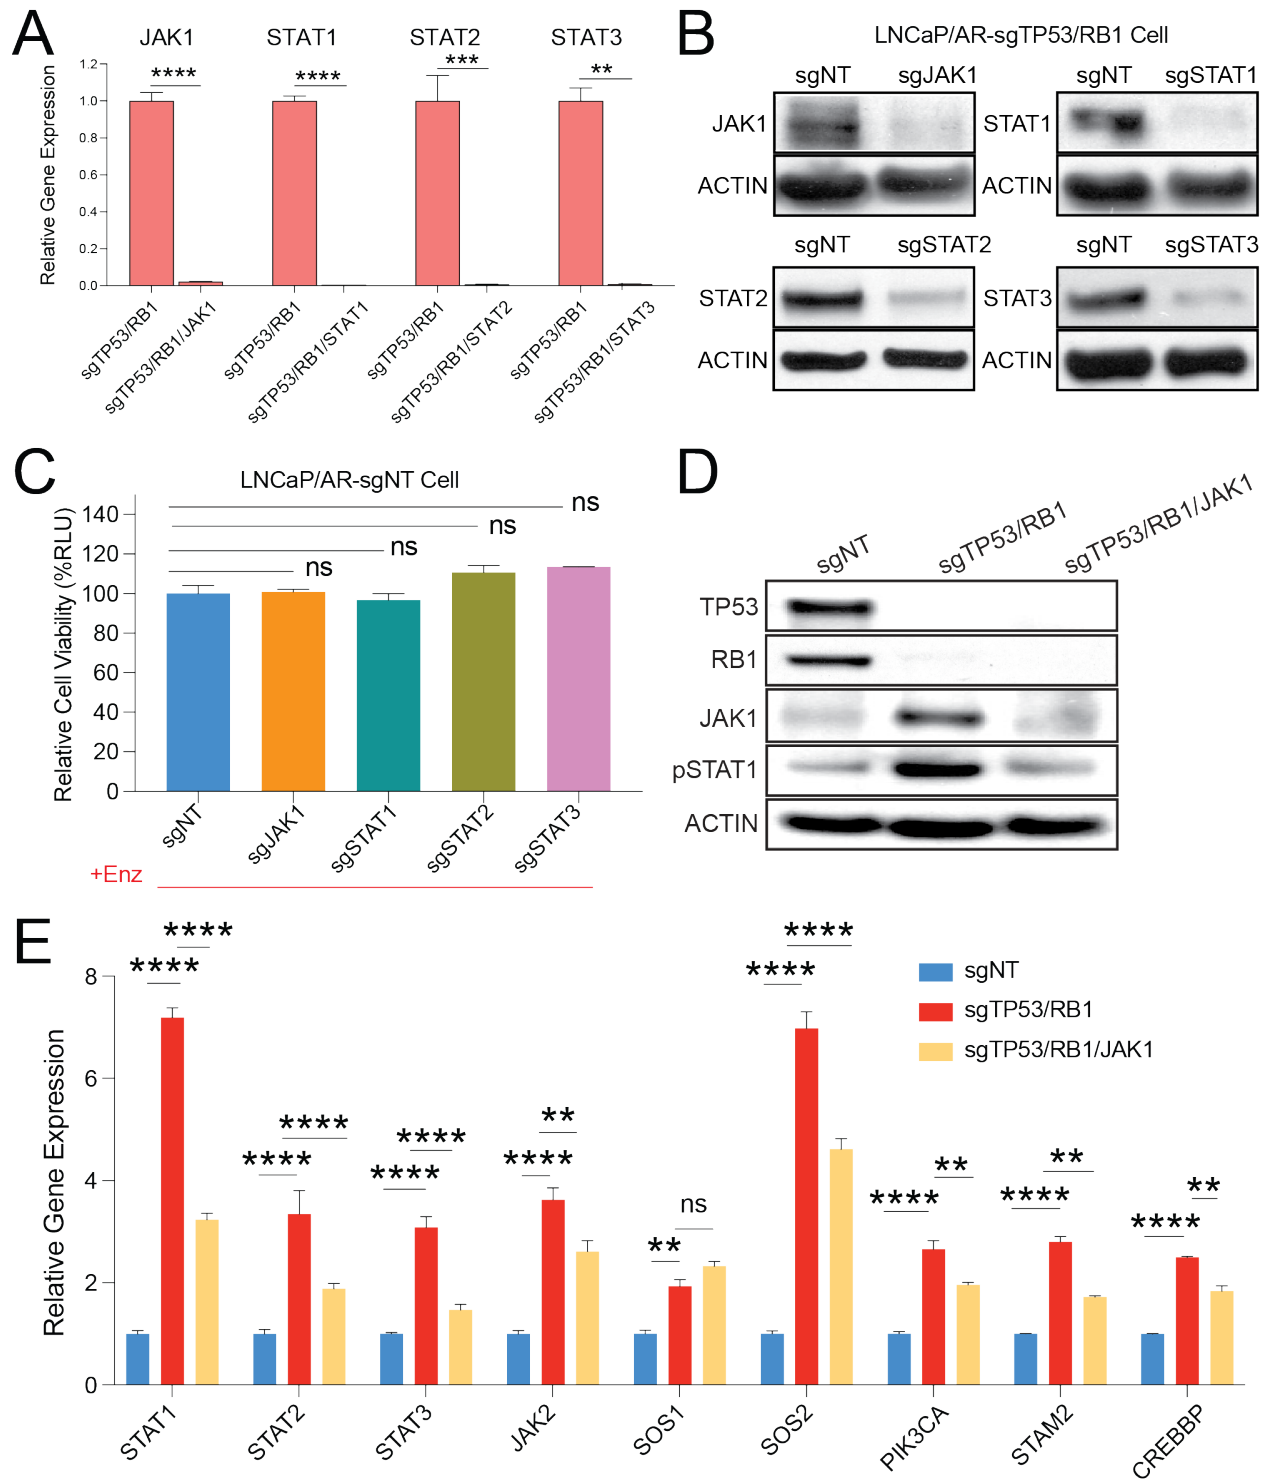

1170  
1171  
1172  
1173  
1174  
1175  
1176

**Fig. S4. JAK-STAT signaling is significantly impaired in the sgTP53/RB1/JAK1 cells. (A)** Relative expression of JAK-STAT genes in LNCaP/AR-sgTP53/RB1 cells transduced with annotated guide RNAs. **(B)** Western blot of JAK1, STAT1-3 proteins in LNCaP/AR cells transduced with annotated guide RNAs. **(C)** Relative cell number of LNCaP/AR-sgNT cells transduced with annotated CRISPR guide RNAs. Cells were treated with 10  $\mu$ M enzalutamide (Enz) for 8 days and cell number was measured using CellTiter-Glo assay, all normalized to sgNT

1177 group. **(D)** Western blot of JAK1 and pSTAT1 proteins in LNCaP/AR cells transduced with  
1178 annotated guide RNAs. **(E)** Relative expression of canonical JAK-STAT genes in LNCaP/AR  
1179 mCRPC cells transduced with annotated guide RNAs. p values were calculated using two-way  
1180 ANOVA. mean  $\pm$  s.e.m. is represented and \*\*\*\* p<0.0001. \*\*\* p<0.001. \*\* p<0.01. \* p<0.05.  
1181 \*\*\*\* p<0.0001. \*\*\* p<0.001. \*\* p<0.01. \* p<0.05.

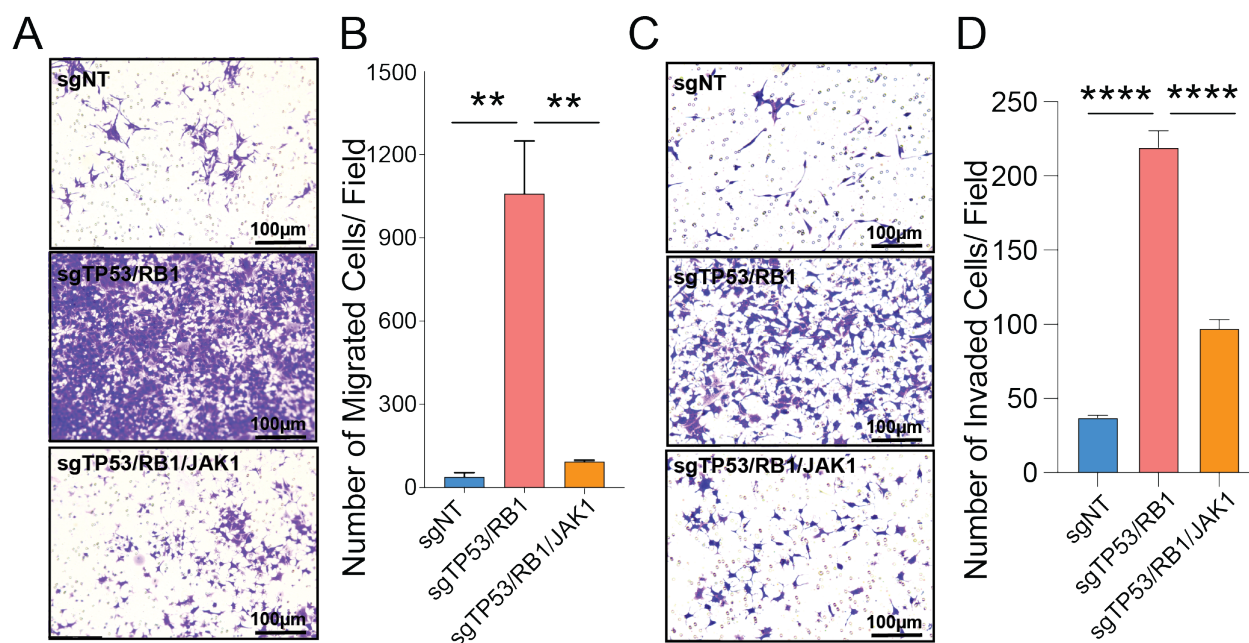

1182  
1183 **Fig. S5. JAK1-KO significantly reversed the increased migration and invasion ability of**  
1184 **mCRPC cells with TP53/RB1-deficiency.** (A) Representative pictures of LNCaP/AR cell (sgNT,  
1185 sgTP53/RB1, sgTP53/RB1/JAK1) transwell migration assay. 9 representative pictures were taken  
1186 for each cell line and scale bar is annotated. (B) Quantification of the migrated cell numbers of 9  
1187 representative images for each of the cell lines. (C) Representative pictures of LNCaP/AR cell  
1188 (sgNT, sgTP53/RB1, sgTP53/RB1/JAK1) invasion assay. 9 representative pictures were taken for  
1189 each cell line and scale bar is annotated. (D) Quantification of the invaded cell numbers of 9  
1190 representative images for each of the cell lines. For all panels, p value was calculated by one way  
1191 ANOVA. mean  $\pm$  s.e.m. is represented and \*\*\*\* p<0.0001. \*\*\* p<0.001. \*\* p<0.01. \* p<0.05.  
1192 \*\*\*\* p<0.0001. \*\*\* p<0.001. \*\* p<0.01. \* p<0.05.

1193  
1194  
1195



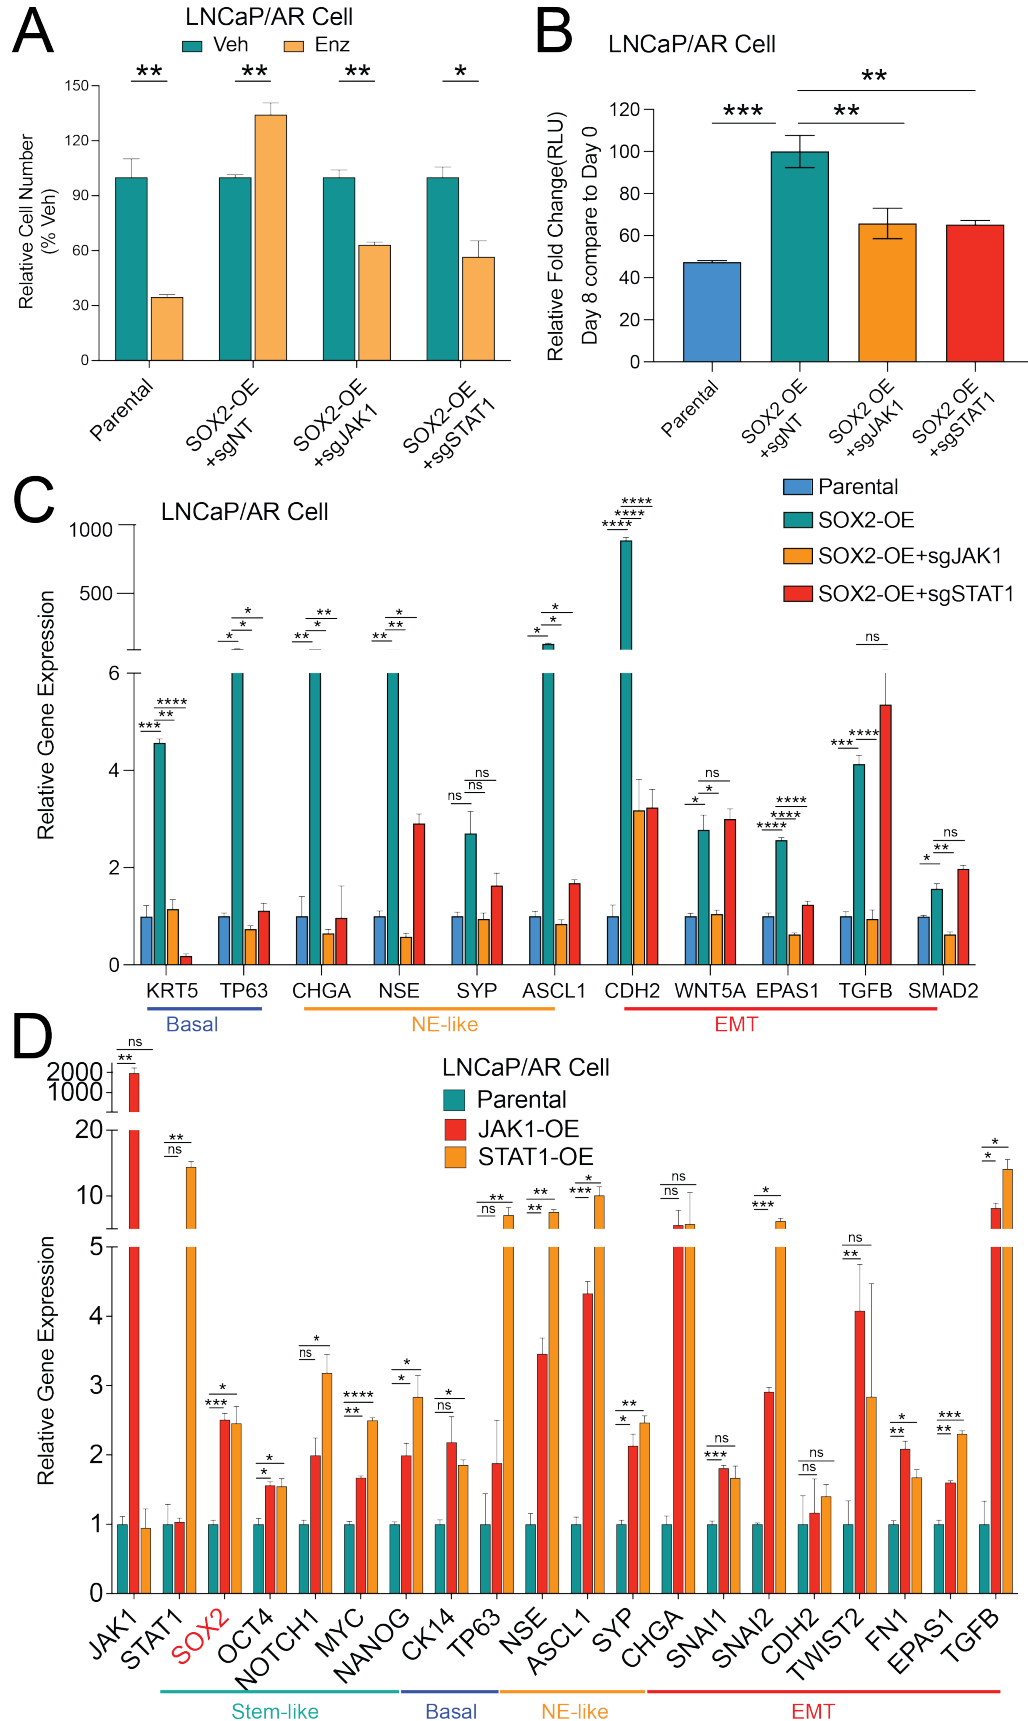

1197 **Fig. S6. JAK-STAT signaling is required for the SOX2-mediated lineage plasticity and**  
1198 **resistance.** (A) Relative cell number of LNCaP/AR cells transduced with annotated constructs and  
1199 treated with various treatments, normalized to “Veh” group. Enz denotes 10 $\mu$ M enzalutamide, Veh  
1200 denotes DMSO treatment with same volume as enzalutamide, for 6 days and cell number were  
1201 measured by cell proliferation assay. mean  $\pm$  s.e.m. is represented, and p values were calculated  
1202 using 2-tailed multiple t-test. (B) Relative cell number fold change of LNCaP/AR cells transduced  
1203 with annotated constructs and treated with various treatments, normalized to “Veh” group. Enz  
1204 denotes 10 $\mu$ M enzalutamide, Veh denotes DMSO treatment with same volume as enzalutamide,  
1205 for 6 days and cell number were measured by CellTiterGlo assay. mean  $\pm$  s.e.m. is represented,  
1206 and p values were calculated using one-way ANOVA. (C) Relative expression of canonical  
1207 lineage marker genes in LNCaP/AR-SOX2-OE cells transduced with annotated constructs. mean  
1208  $\pm$  s.e.m. is represented, and p values were calculated using 2-way ANOVA. (D) Relative  
1209 expression of canonical lineage marker genes in LNCaP/AR cells transduced with JAK1 or STAT1  
1210 cDNA constructs. SOX2 expression is highlighted in red. mean  $\pm$  s.e.m. is represented, and p  
1211 values were calculated using two-way ANOVA. For all panels, \*\*\*\* p<0.0001. \*\*\* p<0.001. \*\*  
1212 p<0.01. \* p<0.05. \*\*\*\* p<0.0001. \*\*\* p<0.001. \*\* p<0.01. \* p<0.05.

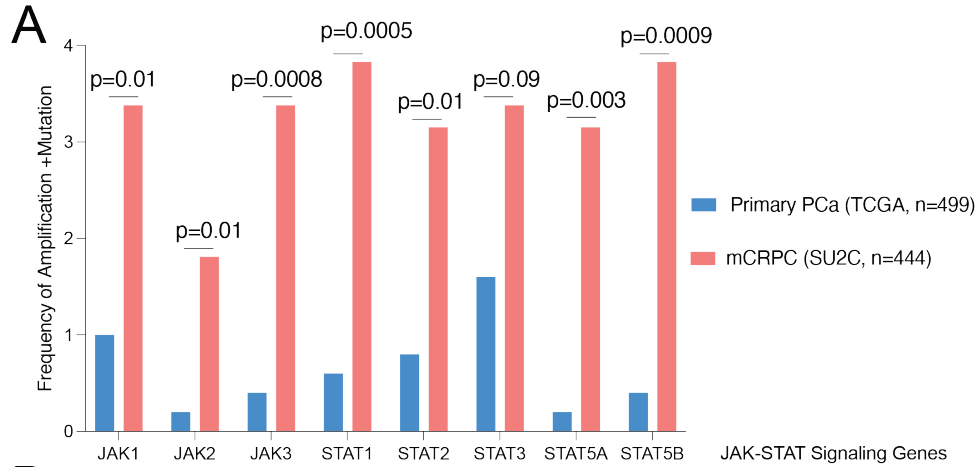

**B**

Number of Cases with Amplification or Mutation in the JAK-STAT Signaling Genes

|         | JAK1 | JAK2 | JAK3 | STAT1 | STAT2 | STAT3 | STAT5A | STAT5B |
|---------|------|------|------|-------|-------|-------|--------|--------|
| Primary | 5    | 1    | 2    | 3     | 4     | 8     | 1      | 3      |
| mCRPC   | 15   | 8    | 15   | 17    | 14    | 15    | 14     | 17     |

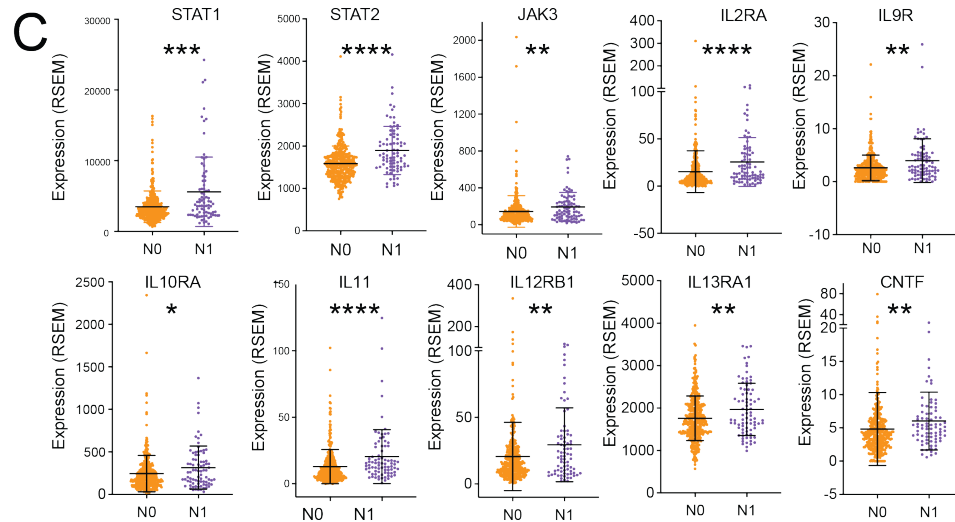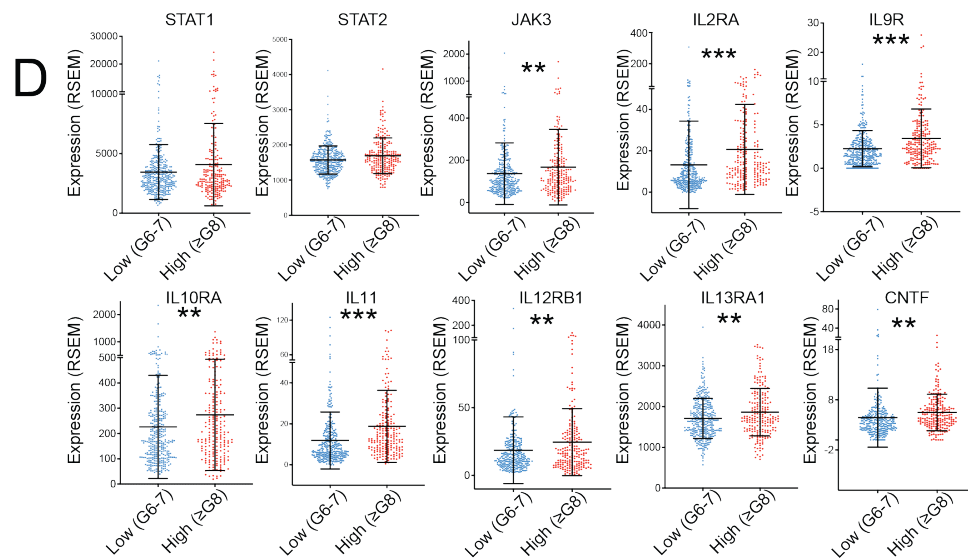

1214 **Fig. S7. JAK1 and STAT1 genomic alterations is correlated with poor outcome of patients**  
1215 **with mCRPC.** (A) Frequency of amplification or mutations in the genomic loci of key JAK-STAT  
1216 signaling genes in the mCRPC tumors of the SU2C cohort, compared to the frequency in the  
1217 primary tumors of the TCGA cohort. p values were calculated using two-tails Fisher's exact test.  
1218 (B) Number of cases with amplification or mutations in the genomic loci of key JAK-STAT  
1219 signaling genes, in the SU2C cohort, compared to the TCGA cohort. (C) Expression (RSEM) of  
1220 JAK-STAT signaling genes in patients with regional lymph nodes metastasis (N1, n=80) compared  
1221 to the ones without regional lymph nodes metastasis (N0, n=345). (D) Expression (RSEM) of JAK-  
1222 STAT signaling genes in the high-grade tumors (Gleason score  $\geq 8$ , n=206) compared to the low-  
1223 grade tumors (Gleason score  $\leq 7$ , n=292). For panel C-D, mean  $\pm$  s.d. is represented and p values  
1224 were calculated using Mann-Whitney test. \*\*\*\* p<0.0001. \*\*\* p<0.001. \*\* p<0.01. \* p<0.05.  
1225 \*\*\*\* p<0.0001. \*\*\* p<0.001. \*\* p<0.01. \* p<0.05.  
1226

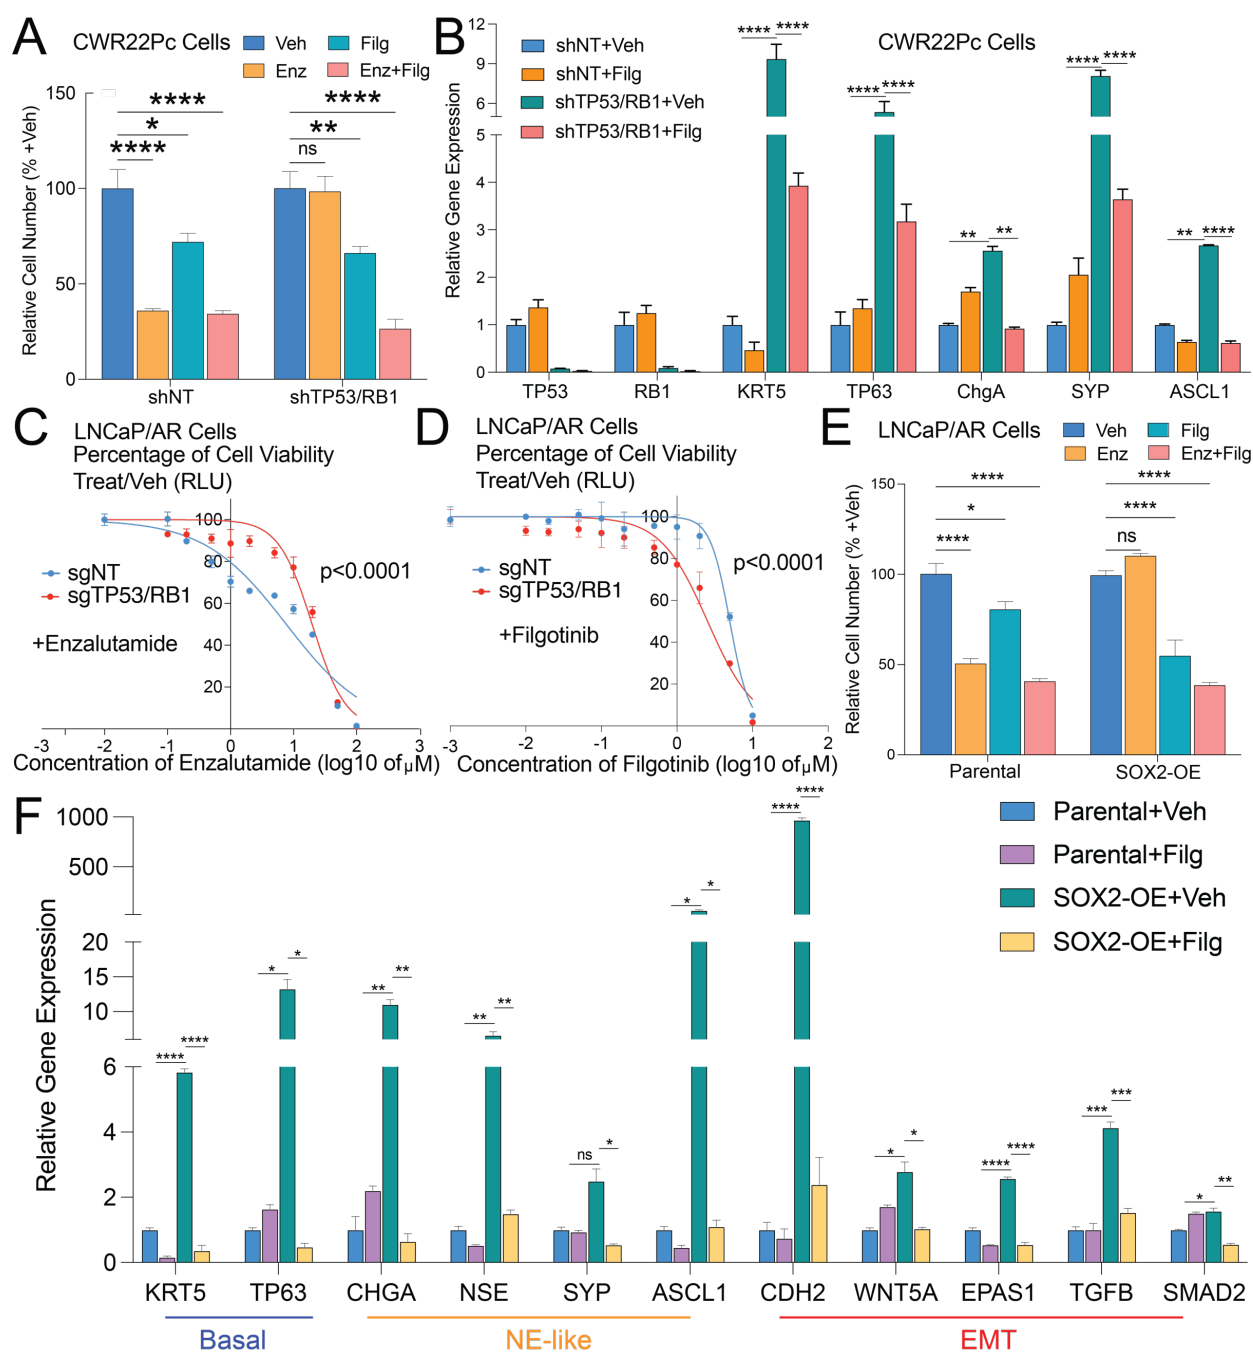

1227  
 1228 **Fig. S8. JAK inhibitor impairs lineage plasticity and restore enzalutamide sensitivity: (A)**  
 1229 Relative cell number of CWR22Pc cells transduced with annotated CRISPR guide RNAs and  
 1230 treated with various treatments, normalized to “Veh” group. Enz denotes 1 $\mu$ M enzalutamide, Filg  
 1231 denotes 5 $\mu$ M filgotinib, Enz+Filg denotes the combination of enzalutamide and filgotinib, Veh  
 1232 denotes DMSO treatment with same volume as enzalutamide. Cells were treated for 4 days and  
 1233 cell number were counted. (B) Relative expression of canonical lineage marker genes in CWR22Pc  
 1234 cells transduced with annotated shRNAs and treated with vehicle or filgotinib, normalized to  
 1235 “shNT+Veh” group. Filg denotes 5 $\mu$ M filgotinib, Veh denotes DMSO treatment with same volume  
 1236 as filgotinib. (C) Enzalutamide dose response curve of LNCaP/AR cells transduced with annotated  
 1237 CRISPR guide RNAs. p values were calculated by non-linear regression with extra sum-of-squares

1238 F test, 3 biological replicates were used for each data point. **(D)** Filgotinib dose response curve of  
1239 LNCaP/AR cells transduced with annotated CRISPR guide RNAs. p values were calculated by  
1240 non-linear regression with extra sum-of-squares F test, 3 biological replicates were used for each  
1241 data point. **(E)** Relative cell number of LNCaP/AR cells transduced with annotated constructs and  
1242 treated with various treatments for 8 days, normalized to “Veh” group. Enz denotes 10 $\mu$ M  
1243 enzalutamide, Filg denotes 10 $\mu$ M filgotinib, Enz+Filg denotes the combination of enzalutamide  
1244 and filgotinib, Veh denotes DMSO treatment with same volume as enzalutamide, for 8 days and  
1245 cell number were counted. **(F)** Relative expression of canonical lineage marker genes in  
1246 LNCaP/AR-SOX2-OE cells treated with annotated treatments. Enz denotes 10 $\mu$ M enzalutamide,  
1247 Veh denotes DMSO treatment with same volume as enzalutamide. Cells were treated for 6 days.  
1248 mean  $\pm$  s.e.m. is represented, and p values were calculated using two-way ANOVA. For all panels,  
1249 \*\*\*\*\* p<0.0001. \*\*\* p<0.001. \*\* p<0.01. \* p<0.05.  
1250

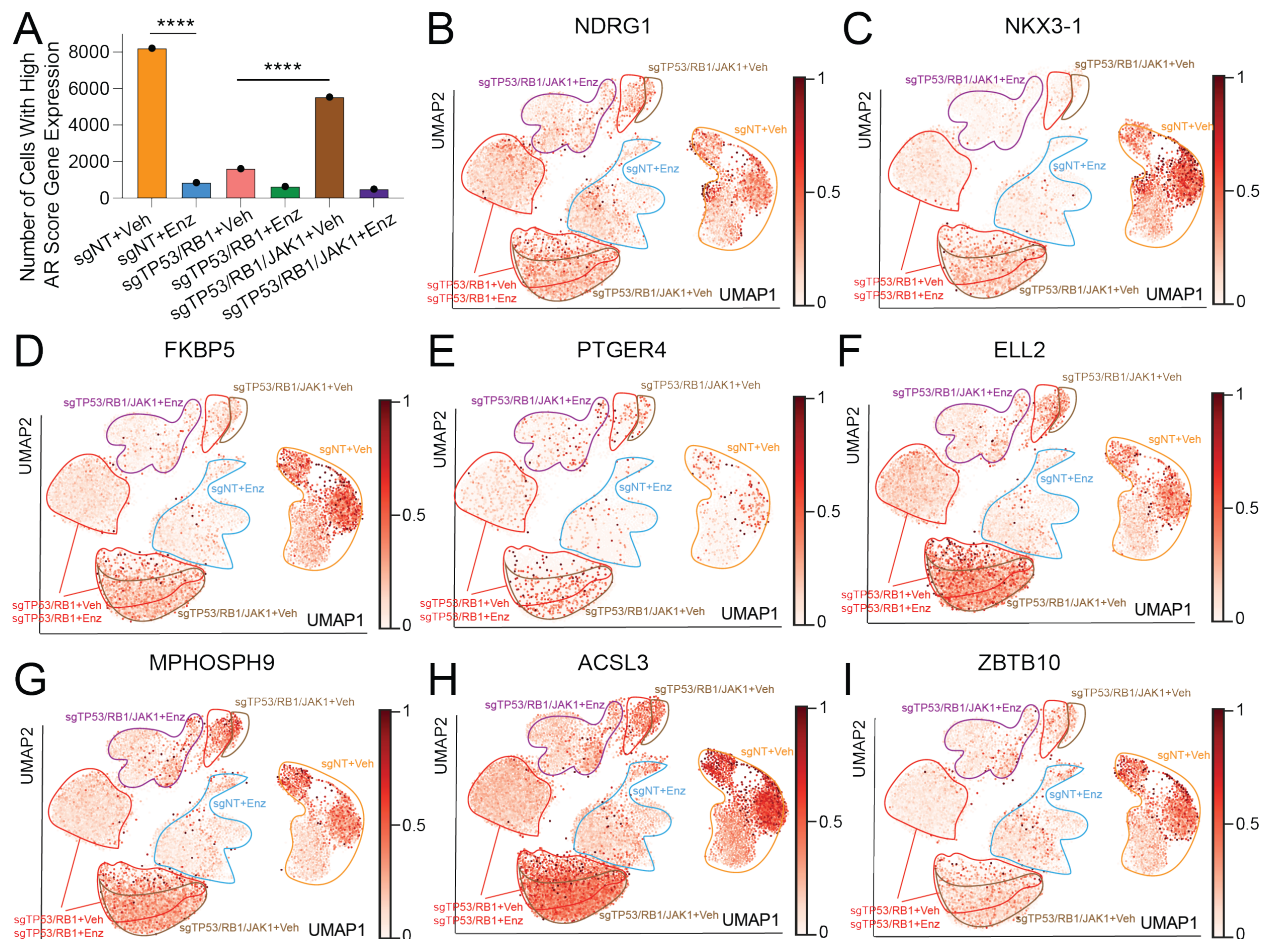

1251  
 1252 **Fig. S9. AR signaling partially restored in the subclones with TP53/RB1/JAK1-KD and**  
 1253 **vehicle treatment:** (A) Bar plot presents the number of single cells express high level (expression  
 1254 level in the top 20% of all single cells of all samples) of AR targeted genes (partial AR Score genes  
 1255 as shown in table S2). p-values are calculated with Chi-square test with Yates correction. \*\*\*\*  
 1256  $p < 0.0001$ , \*\*\*  $p < 0.001$ , \*\*  $p < 0.01$ , \*  $p < 0.05$ . ns: not significant. (B-I) UMAP plot of single cell  
 1257 transcriptomic profiles colored by expression of selected AR target genes (z-score, AR Score  
 1258 genes) for each cell (dot) of LNCaP/AR cells transduced with annotated CRISPR guide RNAs and  
 1259 treated with vehicle or enzalutamide for 5 days. Color density of each cell is scaled by the color  
 1260 bar. Fields of different sample groups are labeled with different color.  
 1261

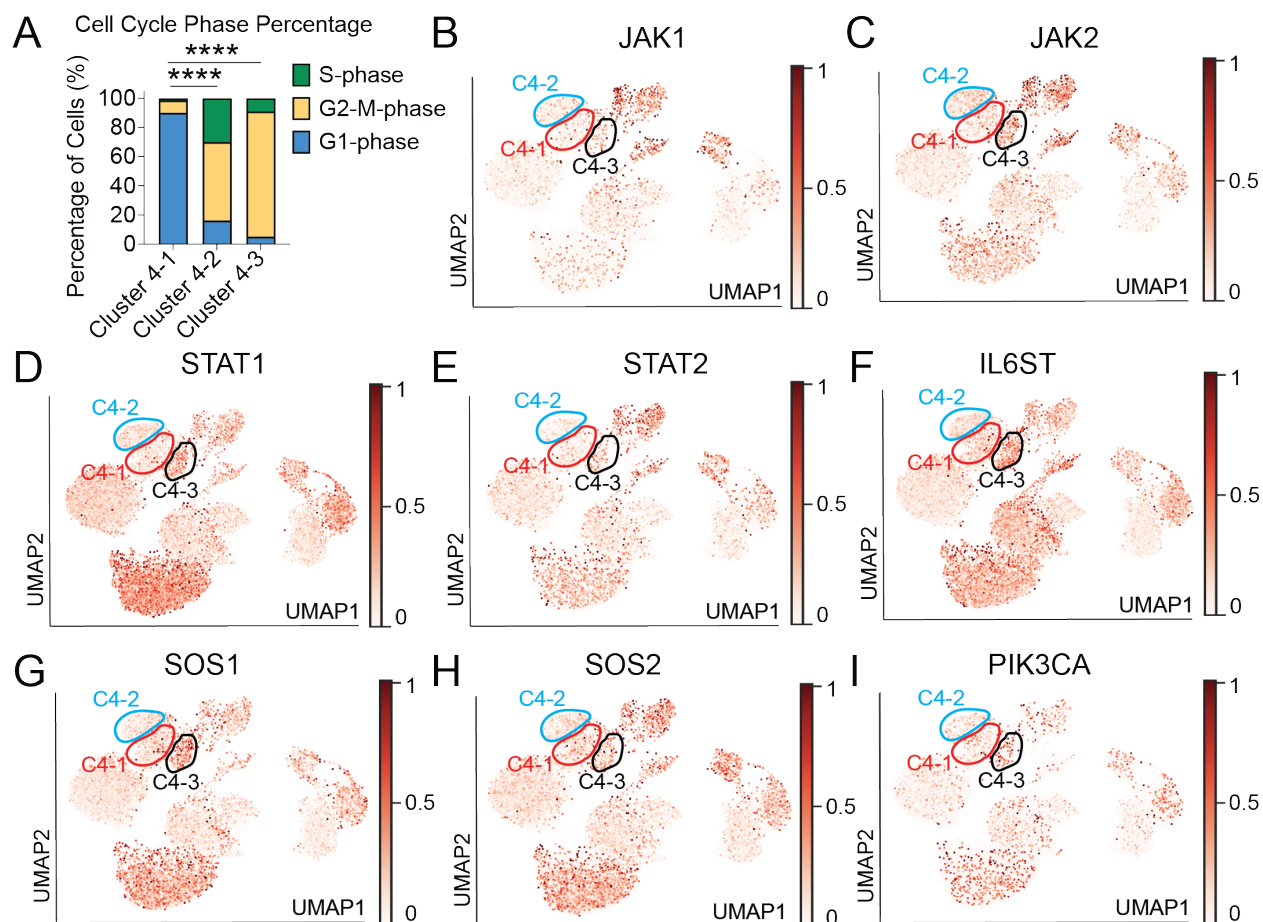

1262  
1263  
1264  
1265  
1266  
1267  
1268  
1269  
1270

**Fig. S10. Subclusters within the Cluster 4 display remaining and various levels of JAK-STAT signaling:** (A) Bar plot presents the percentage distribution of each single cells in different cell cycle phases in subcluster 4-1, 4-2 and 4-3. p-values are calculated with Fisher's Exact Test. \*\*\*\*  $p < 0.0001$ . (B-I) UMAP plot of single cell transcriptomic profiles colored by expression of canonical JAK-STAT target genes (z-score) for each cell (dot) of LNCaP/AR cells transduced with annotated CRISPR guide RNAs and treated with vehicle or enzalutamide for 5 days. For panel B-I, distribution area of subcluster 4-1, 4-2, 4-3 are labeled with red, blue and black. Color density of each cell is scaled by the color bar.



1271 **Table S1: Gene Set Enrichment Analysis (GSEA) results show significantly changed**  
 1272 **signaling pathways.** GSEA results of six different comparisons, including the enriched gene lists,  
 1273 are presented in attached excel file: table S1\_GSEA results.xlsx.  
 1274

1275 **TableS2: AR Score and lineage specific signatures gene lists.** The AR score gene signature was  
 1276 adapted from Hieronymus et al(48), luminal, basal and NE gene signatures were defined by  
 1277 combining the signature genes from(10, 11, 46, 47). EMT and stem-like gene signature were  
 1278 adapted from the signature genes of Dong et al(47)plus canonical lineage marker genes.

| AR Score Gene | Partially Restored AR Score Gene | Luminal    | Basal    | NE      | EMT    | Stem-like |
|---------------|----------------------------------|------------|----------|---------|--------|-----------|
| ABCC4         | ABCC4                            | ACPP       | AEBP1    | BRINP1  | CDH2   | ALDH1A1   |
| ACSL3         | ACSL3                            | ALDH1A3    | ANXA8L2  | ASCL1   | CDH11  | ALCAM     |
| ADAM7         | C1orf116                         | ALOX15B    | ARHGAP25 | C7orf76 | DCN    | CD44      |
| C1orf116      | EAF2                             | AMACR      | BNC1     | CHGA    | DSP    | CD55      |
| CENPN         | ELL2                             | ANKRD1     | C16orf74 | CHGB    | FN1    | KIT       |
| EAF2          | FKBP5                            | ANO7       | CAV1     | ENO2    | SNAI1  | KLF4      |
| ELL2          | GNMT                             | AR         | CAV2     | EZH2    | SNAI2  | NANOG     |
| FKBP5         | HERC3                            | ASRGL1     | CDH13    | FOXA2   | TWIST1 | NES       |
| GNMT          | MPHOSPH9                         | C2         | CNTNAP3B | GNAO1   | VIM    | NOTCH4    |
| HERC3         | NKX3-1                           | CCK        | COL17A1  | INSM1   | ZEB1   | OCT4      |
| KLK2          | PMEPA1                           | CD24       | COL4A6   | KCNB2   | ZEB2   | PDPN      |
| KLK3          | PTGER4                           | CHI3L2     | CSMD2    | KCND2   |        | PROM1     |
| MAF           | TMPRSS2                          | CLDN3      | CYR61    | LRRC16B |        | SOX2      |
| MED28         | ZBTB10                           | CPNE4      | DKK1     | MAP10   |        | WNT7A     |
| MPHOSPH9      |                                  | CSGALNACT1 | DKK3     | MYCN    |        |           |
| NKX3.1        |                                  | CWH43      | DLC1     | NCAM1   |        |           |
| NNMT          |                                  | DCDC2      | DLK2     | NKX2-1  |        |           |
| PMEPA1        |                                  | DLL4       | ERG      | NRSN1   |        |           |
| PTGER4        |                                  | DNAJC12    | FAT3     | PCSK1   |        |           |
| TMPRSS2       |                                  | DOCK11     | FGFR3    | POU3F2  |        |           |
| ZBTB10        |                                  | DPP4       | FHL1     | PROX1   |        |           |
|               |                                  | ELOVL2     | FJX1     | RGS7    |        |           |
|               |                                  | ERG        | FLRT2    | SCG3    |        |           |
|               |                                  | FBP1       | FOXI1    | SEC11C  |        |           |
|               |                                  | FGF13      | GIMAP8   | SEZ6    |        |           |
|               |                                  | FOLH1      | HMGA2    | SIAH2   |        |           |

|  |  |           |               |         |  |  |
|--|--|-----------|---------------|---------|--|--|
|  |  | GFPT2     | IGFBP7        | SOX2    |  |  |
|  |  | GPR98     | IL1A          | ST8SIA3 |  |  |
|  |  | HLA-DMB   | IL33          | SVOP    |  |  |
|  |  | INHBB     | ITGA6         | SYP     |  |  |
|  |  | KCNN2     | ITGA6         | SYT11   |  |  |
|  |  | KLK3      | JAG2          |         |  |  |
|  |  | KMO       | JAM3          |         |  |  |
|  |  | KRT18     | KCNMA1        |         |  |  |
|  |  | KRT20     | KCNQ5         |         |  |  |
|  |  | KRT8      | KIRREL        |         |  |  |
|  |  | LMAN1L    | KRT14         |         |  |  |
|  |  | LMO7      | KRT15         |         |  |  |
|  |  | LOC286002 | KRT17         |         |  |  |
|  |  | LTB       | KRT34         |         |  |  |
|  |  | MB        | KRT5          |         |  |  |
|  |  | MUC2      | KRT6A         |         |  |  |
|  |  | NKX3-1    | LTBP2         |         |  |  |
|  |  | NPTX2     | MMP3          |         |  |  |
|  |  | OSTalpha  | MRC2          |         |  |  |
|  |  | PDE8B     | MSRB3         |         |  |  |
|  |  | PGC       | MUM1L1        |         |  |  |
|  |  | PLA2G2A   | NGFR          |         |  |  |
|  |  | POTEM     | NIPAL4        |         |  |  |
|  |  | PPM1H     | NOTCH4        |         |  |  |
|  |  | PSCA      | NRG1          |         |  |  |
|  |  | PTPRN2    | PDPN          |         |  |  |
|  |  | RAMP1     | SERPINB1<br>3 |         |  |  |
|  |  | RIMS1     | SERPINF1      |         |  |  |
|  |  | SERHL2    | SH2D5         |         |  |  |
|  |  | SLC2A12   | SPARC         |         |  |  |
|  |  | SPDEF     | SYNE1         |         |  |  |
|  |  | ST8SIA1   | TAGLN         |         |  |  |
|  |  | SYT7      | THBS2         |         |  |  |
|  |  | TBXAS1    | TNC           |         |  |  |
|  |  | TOX3      | TP63          |         |  |  |
|  |  | TRPM8     | VSNL1         |         |  |  |
|  |  | TRPV6     | WNT7A         |         |  |  |
|  |  | TSPAN8    |               |         |  |  |
|  |  | UPK1A     |               |         |  |  |
|  |  | VNN3      |               |         |  |  |
